1  
2  
3  
4  
5  
6  
7  
8  
9  
10  
11  
12  
13  
14  
15  
16  
17  
18  
19  
20  
21  
22  
23  
24  
25  
26  
27  
28  
29  
30

# A dual function of the IDA peptide in regulating cell separation and modulating plant immunity at the molecular level

Vilde Olsson Lalun<sup>1</sup>, Maike Breiden<sup>§2</sup>, Sergio Galindo-Trigo<sup>1§</sup>, Elwira Smakowska-Luzan<sup>3</sup>, Rüdiger Simon<sup>2</sup> and Melinka A. Butenko<sup>1\*</sup>

<sup>1</sup>Section for Genetics and Evolutionary Biology, Department of Biosciences, University of Oslo, 0316 Oslo, Norway

<sup>2</sup>Institute for Developmental Genetics and Cluster of Excellence on Plant Sciences, Heinrich Heine University, Universitätsstraße 1, 40225 Düsseldorf, Germany

<sup>3</sup>Gregor Mendel Institute (GMI), Austrian Academy of Sciences, Vienna Biocenter (VBC), Dr Bohr-Gasse 3, 1030 Vienna, Austria

<sup>§</sup>Equal contribution

\*Corresponding author; email: [m.a.butenko@ibv.uio.no](mailto:m.a.butenko@ibv.uio.no)

## Abstract:

The abscission of floral organs and emergence of lateral roots in *Arabidopsis* is regulated by the peptide ligand INFLORESCENCE DEFICIENT IN ABSCISSION (IDA) and the receptor protein kinases HAESA (HAE) and HAESA-LIKE 2 (HSL2). During these cell separation processes, the plant induces defense-associated genes to protect against pathogen invasion. However, the molecular coordination between abscission and immunity has not been thoroughly explored. Here we show that IDA induces a release of cytosolic calcium ions (Ca<sup>2+</sup>) and apoplastic production of reactive oxygen species, which are signatures of early defense responses. In addition, we find that IDA promotes late defense responses by the transcriptional upregulation of genes known to be involved in immunity. When comparing the IDA induced early immune responses to known immune responses, such as those elicited by flagellin22 treatment, we observe both similarities and differences. We propose a molecular mechanism by which IDA promotes signatures of an immune response in cells destined for separation to guard them from pathogen attack.

## 31 Introduction

32 All multicellular organisms require tightly regulated cell-to-cell communication during development and  
33 adaptive responses. In addition to hormones, plants use small-secreted peptide ligands to regulate  
34 these highly coordinated events of growth, development and responses to abiotic and biotic stress  
35 (Matsubayashi, 2011; Olsson et al., 2018). In plants, organ separation or abscission, involves cell  
36 separation between specialized abscission zone (AZ) cells and enables the removal of unwanted or  
37 diseased organs in response to endogenous developmental signals or environmental stimuli.  
38 *Arabidopsis thaliana* (*Arabidopsis*) abscise floral organs (stamen, petals and sepals) after pollination, and  
39 this system has been used as a model to study the regulation of cell separation and abscission (Bleecker  
40 & Patterson, 1997). Precise cell separation also occurs during the emergence of new lateral root (LR)  
41 primordia, root cap sloughing, formation of stomata and radicle emergence during germination  
42 (Roberts et al., 2000). In *Arabidopsis*, the INFLORESCENCE DEFICIENT IN ABSCISSION (IDA) peptide  
43 mediated signaling system ensures the correct spatial and temporal abscission of sepals, petals, and  
44 stamens. The IDA protein shares a conserved C-terminal domain with the other 7 IDA-LIKE (IDL)  
45 members (Butenko et al., 2003, Vie et al., 2015) which is processed to a functional 12 amino acid  
46 hydroxylated peptide (Butenko et al., 2014). The abscission process is regulated by the production and  
47 release of IDA, which binds the genetically redundant plasma membrane (PM) localized receptor kinases  
48 (RKs), HAESA (HAE) and HAESA-LIKE 2 (HSL2). IDA binding to HAE and HSL2 promotes receptor  
49 association with members of the co-receptor SOMATIC EMBRYOGENESIS RECEPTOR KINASE (SERK)  
50 family and further downstream signaling leading to cell separation events. (Cho et al., 2008; Meng et  
51 al., 2016; Santiago et al., 2016; Stenvik et al., 2008). Recently, it has been shown that IDA and IDL family  
52 members also bind and activate HSL1 in the regulation of leaf epidermal patterning, indicating  
53 subfunctionalisation within this clade of receptors (Roman et al., 2022) and opens for the possibility that  
54 HAE or HSL2 could have additional functions than regulating cell separation events.

55 A deficiency in the IDA signaling pathway prevents the expression of genes encoding secreted cell wall  
56 remodeling and hydrolase enzymes thus hindering floral organs to abscise (Butenko et al., 2003; Cho et  
57 al., 2008; Kumpf et al., 2013; Xiangzong Meng et al., 2016; Niederhuth et al., 2013; Stenvik et al., 2008;  
58 Isaiah Taylor & John C. Walker, 2018). Interestingly, components of the IDA signaling pathway control  
59 different cell separation events during *Arabidopsis* development. IDA signaling through HAE and HSL2  
60 regulates cell wall remodeling genes in the endodermal, cortical, and epidermal tissues overlaying the  
61 LR primordia during LR emergence (Kumpf et al., 2013). In addition, IDL1 signals through HSL2 to  
62 regulate cell separation during root cap sloughing (Shi et al., 2018).

63 Plant cell walls act as physical barriers against pathogenic invaders. The cell-wall processing and  
64 remodeling that occurs during abscission leads to exposure of previously protected tissue. This provides  
65 an entry point for phytopathogens thereby increasing the need for an effective defense system in these

66 cells (Agustí et al., 2009). Indeed, it has been shown that AZ cells undergoing cell separation express  
67 defense genes and it has been proposed that they function in protecting the AZ from infection after  
68 abscission has occurred (Cai & Lashbrook, 2008; Niederhuth et al., 2013). IDA elicits the production of  
69 Reactive Oxygen Species (ROS) in *Nicotiana benthamiana* (*N. benthamiana*) leaves transiently expressing  
70 the HAE or HSL2 receptor (Butenko et al., 2014). As a consequence of defense responses, ROS occurs in  
71 the apoplast and is involved in regulating the cell wall structure by producing cross-linking of cell wall  
72 components in the form of hydrogen peroxide (H<sub>2</sub>O<sub>2</sub>) or act as cell wall loosening agents in the form of  
73 hydroxyl radical ( $\cdot$ OH) radicals (Kärkönen & Kuchitsu, 2015). ROS may also serve as a direct defense  
74 response by their highly reactive and toxic properties (Kärkönen & Kuchitsu, 2015). In addition, ROS may  
75 act as a secondary signaling molecule enhancing intracellular defense responses as well as contributing  
76 to the induction of defense related genes (Reviewed in (Castro et al., 2021)). In Arabidopsis, apoplastic  
77 ROS is mainly produced by a family of NADPH oxidases located in the plasma membrane known as  
78 RESPIRATORY BURST OXIDASE PROTEINs (RBOHs) (Torres & Dangl, 2005). The production of ROS is often  
79 found closely linked to an increase in the concentration of cytosolic Ca<sup>2+</sup> ([Ca<sup>2+</sup>]<sub>cyt</sub>), where the interplay  
80 between these signaling molecules is observed in immunity across kingdoms (Kadota et al., 2015;  
81 Steinhorst & Kudla, 2013). Interestingly, ROS and [Ca<sup>2+</sup>]<sub>cyt</sub> are known signaling molecules acting  
82 downstream of several peptide ligand-receptor pairs. This includes the endogenous PAMPs ELICITOR  
83 PEPTIDE(PEP)1, PEP2 and PEP3 which function as elicitors of systemic responses against pathogen attack  
84 and herbivory (Huffaker et al., 2006; Ma et al., 2012; Qi et al., 2010), as well as the pathogen derived  
85 peptide ligands flagellin22 (flg22) and elongation factor thermo unstable(Ef-Tu) which bind and activate  
86 defense related RKs in the PM of the plant cell (Felix et al., 1999; Gómez-Gómez et al., 1999; Ranf et al.,  
87 2011).

88 The interplay between ROS and [Ca<sup>2+</sup>]<sub>cyt</sub> has been well studied in the flg22 induced signaling system. The  
89 flg22 peptide interacts with the extracellular domain of the FLAGELLIN SENSING2 (FLS2) receptor kinase,  
90 which rapidly leads to an increase in [Ca<sup>2+</sup>]<sub>cyt</sub> (Ranf et al., 2011). In a resting state, the co-receptor  
91 BRASSINOSTEROID INSENSITIVE1-ASSOCIATED RECEPTOR KINASE1/SERK3) (BAK1) and the cytoplasmic  
92 kinase BOTRYTIS-INDUCED KINASE1 (BIK1) form a complex with FLS2. Upon binding of flg22 to the FLS2  
93 receptor, BIK1 is released from the receptor complex and activates intracellular signaling molecules  
94 through phosphorylation, among other, the PM localized RBOHD (Kadota et al., 2014; Li et al., 2014).  
95 The flg22 induced apoplastic ROS produced binds to PM localized Ca<sup>2+</sup> channels on neighboring cells,  
96 activating Ca<sup>2+</sup> influx into the cytosol. The cytosolic Ca<sup>2+</sup> may bind to CALCIUM DEPENDENT PROTEIN  
97 KINASE5 (CDPKs) regulating RBOHD activity through phosphorylation. The Ca<sup>2+</sup> dependent  
98 phosphorylation of RBOH enhances ROS production, which in turn leads to a propagation of the  
99 ROS/Ca<sup>2+</sup> signal through the plant tissue (Dubiella et al., 2013)

100 A rapid increase in  $[Ca^{2+}]_{cyt}$  is not only observed in peptide-ligand induced signaling. Similar  $[Ca^{2+}]_{cyt}$   
101 changes are observed as responses to developmental signals, such as extracellular auxin and  
102 environmental signals such as high salt conditions and drought (reviewed in (Kudla et al., 2018)). Also,  
103  $[Ca^{2+}]_{cyt}$  signals are observed in single cells during pollen tube and root hair growth (Monshausen et al.,  
104 2008; Sanders et al., 1999). How cells decipher the  $[Ca^{2+}]_{cyt}$  changes into a specific cellular response is  
105 still largely unknown, however the cell contains a large toolkit of  $Ca^{2+}$  sensor proteins that may affect  
106 cellular function through changes in protein phosphorylation and gene expression. Each  $Ca^{2+}$  binding  
107 protein has specific affinities for  $Ca^{2+}$  allowing them to respond to different  $Ca^{2+}$  concentrations  
108 providing a specific cellular response (Geiger et al., 2010; Scherzer et al., 2012).

109

110 Given our previous studies showing IDA induced apoplastic ROS production (Butenko et al., 2014), and  
111 the known link between ROS and  $[Ca^{2+}]_{cyt}$  response observed for other ligands such as flg22 (Dubiella et  
112 al., 2013), we sought to investigate if IDA induces a release of  $[Ca^{2+}]_{cyt}$ . Here we report that IDA is able  
113 to induce an intracellular release of  $Ca^{2+}$  in Arabidopsis root tips as well as in the AZ. Pursuing the tight  
114 connection between ROS and  $Ca^{2+}$  in other defense signaling systems we explored if the the observed  
115 production of ROS and  $Ca^{2+}$  in the IDA-HAE/HSL2 signaling pathway could be linked to the involvement  
116 of IDA in regulating plant defense (Patharkar et al., 2017). We show that a range of biotic and abiotic  
117 signals can induce *IDA* expression and we demonstrate that the IDA signal modulates responses of plant  
118 immune signaling. We propose that, in addition to regulating cell separation, IDA plays a role in  
119 enhancing a defense response in tissues undergoing cell separation thus providing the essential need  
120 for enhanced defense responses in tissue during the cell separation event.

121

122

## 123 **Results:**

### 124 **IDA induces apoplastic production of ROS and elevation in cytosolic calcium-ion concentration**

125 We have previously shown that a 12 amino acids functional IDA peptide, hereby referred to as mIDA  
126 (Sup Table 1), elicits the production of a ROS burst in *N.benthamiana* leaves transiently expressing *HAE*  
127 or *HSL2* (Butenko et al., 2014). To investigate whether mIDA could elicit a ROS burst in Arabidopsis, a  
128 luminol-dependent ROS assay on *hae hsl2* mutant rosette leaves expressing the full length HAE receptor  
129 under a constitutive promoter (*35S:HAE-YFP*) was performed. *hae hsl2 35S:HAE-YFP* leaf discs treated  
130 with mIDA emitted extracellular ROS, whereas no response was observed in wild-type (WT) leaves (Sup  
131 Fig.1a-c). We investigated the activity of the *HAE* and *HSL2* promoter in 22 days old Arabidopsis rosette  
132 leaves by cloning the promoters fused to the nuclear localized YFP-derived fluorophore Venus protein

133 (*pHAE:Venus-H2B*, *pHSL2:Venus-H2B*) and could observe a decrease in promoter activity in the oldest  
134 rosette leaves giving a possible explanation to the lack of mIDA induced ROS in true leaves (Sup Fig.  
135 1d,e). Since rapid production of ROS is often linked to an elevation in  $[Ca^{2+}]_{cyt}$  (Steinhorst & Kudla, 2013),  
136 we aimed to investigate if mIDA could induce a  $[Ca^{2+}]_{cyt}$  response. We imaged  $Ca^{2+}$  in 10 days-old roots  
137 expressing the cytosolic localized fluorescent  $Ca^{2+}$  sensor R-GECO1 (Keinath et al., 2015). As a positive  
138 control for  $[Ca^{2+}]_{cyt}$  release we added 1 mM extracellular ATP (eATP), which leads to a  $[Ca^{2+}]_{cyt}$  elevation  
139 in the root tip within a minute after application (Fig. 1a) (Breiden et al., 2021). Following application of  
140 1  $\mu$ M mIDA, we detected an increase in  $[Ca^{2+}]_{cyt}$  (Fig. 1a and Movie 1). R-GECO1 fluorescence intensities  
141 normalized to background intensities ( $\Delta F/F$ ) were measured from a region of interest (ROI) covering the  
142 meristematic and elongation zone of the root and revealed that the response starts 4-5 minutes after  
143 application of the mIDA peptide and lasts for 7-8 minutes (Fig. 1a). The signal initiated in the root  
144 meristematic zone from where it spread toward the elongation zone and root tip, a second wave was  
145 observed in the meristematic zone continuing with  $Ca^{2+}$  spikes. The signal amplitude was at a maximum  
146 within the elongation zone and decreased as the signal spread (Fig. 1a).

147 The  $[Ca^{2+}]_{cyt}$  response in roots to the bacterial elicitor flg22 has previously been studied using the R-  
148 GECO1 sensor (Keinath et al., 2015). To better understand the specificity of the mIDA induced  $Ca^{2+}$   
149 response, we aimed to compare the  $Ca^{2+}$  dynamics in mIDA treated roots to those treated with flg22.  
150 We observed striking differences in the onset and distribution of the  $Ca^{2+}$  signals. Analysis of roots  
151 treated with 1  $\mu$ M flg22 showed that the  $Ca^{2+}$  signal initiated in the root elongation zone from where it  
152 spread toward the meristematic zone as a single wave and that the signal amplitude was at a maximum  
153 within the elongation zone and decreased as the signal spread (Fig. 1b, Movie 2). These observations  
154 indicate differences in tissue specificity of  $Ca^{2+}$  responses between mIDA and flg22, which we  
155 hypothesize depend on the cellular distribution of their cognate receptors. Indeed, when investigating  
156 the promoter activity of the *HAE*, *HSL2* and *FLS2* receptors by the use of nuclear localized transcriptional  
157 reporter lines we observed a different pattern of fluorescent nuclei in the roots (Fig. 1c,d,e).  
158 *pHAE:Venus-H2B* lines had fluorescent expression in the epidermis and stele of the elongation zone (Fig.  
159 1c) and *pHSL2:Venus-H2B* lines in the lateral root cap, root tip and root meristem (Fig. 1d); while  
160 fluorescent nuclei were observed in the stele of the elongation zone in *pFLS2:Venus-H2B* lines (Fig. 1e).  
161 The different patterns of fluorescent nuclei observed for the three different receptor constructs could  
162 indeed explain the differences in the  $Ca^{2+}$  signatures triggered by mIDA and flg22. However, the  
163 receptors promoter activity show a broader expression pattern compared to the respective ligand  
164 induced  $[Ca^{2+}]_{cyt}$  responses, indicating additional regulating factors for the observed  $[Ca^{2+}]_{cyt}$  response.

165 To further investigate the mIDA induced  $Ca^{2+}$  response, we used a cytosolic localized Aequorin-based  
166 luminescence  $Ca^{2+}$  sensor (Aeq) (Knight et al., 1991). The Aeq sensor was chosen due to the well-

167 established use of this sensor in studies investigating peptide induced  $\text{Ca}^{2+}$  responses (Ranf et al., 2011)  
168 Removing the last Asparagine of the mIDA peptide (IDA $\Delta$ N69; Sup Table 1) renders it inactive (Butenko  
169 et al., 2014). 7 days old *Aeq*-Seedlings treated with 1  $\mu\text{M}$  IDA $\Delta$ N69 did not show any increase in  $[\text{Ca}^{2+}]_{\text{cyt}}$   
170 (Sup Fig. 4a). To investigate if the  $[\text{Ca}^{2+}]_{\text{cyt}}$  increase triggered by mIDA was dependent on extracellular  
171  $\text{Ca}^{2+}$ , we pre-treated seedling with  $\text{LaCl}_3$  and Ethylene glycol-bis (2-aminoethylether)- N, N, N',N'-  
172 tetraacetic acid (EGTA).  $\text{LaCl}_3$  and EGTA are inhibitors that block plasma membrane localized cation  
173 channels and chelate  $\text{Ca}^{2+}$  in the extracellular space, respectively (Knight et al., 1997). The mIDA induced  
174 response was abolished in *Aeq*-seedlings pre-incubated in 2 mM EGTA or 1 mM  $\text{LaCl}_3$  (Sup Fig. 4b),  
175 indicating that the mIDA dependent  $[\text{Ca}^{2+}]_{\text{cyt}}$  response depends on  $\text{Ca}^{2+}$  from the extracellular space.

176 Next we set out to investigate whether mIDA would trigger an increase in  $[\text{Ca}^{2+}]_{\text{cyt}}$  in floral AZ cells. We  
177 utilized the *Aeq* expressing line and monitored  $[\text{Ca}^{2+}]_{\text{cyt}}$  changes in flowers at different developmental  
178 stages (see Sup Fig. 5a for developmental stages [floral positions]) to 1  $\mu\text{M}$  mIDA. Interestingly, only  
179 flowers at a the stage where there is an initial weakening of the AZ cell walls showed an increase in  
180  $[\text{Ca}^{2+}]_{\text{cyt}}$  (Sup Fig. 5). Flowers treated with mIDA prior to cell wall loosening showed no increase in  
181 luminescence (Sup Fig. 5), indicating that the mIDA triggered  $\text{Ca}^{2+}$  release in flowers correlates with the  
182 onset of the abscission process and the increase in *HAE* and *HSL2* expression at the AZ (Cai & Lashbrook,  
183 2008; Patharkar & Walker, 2015). Using plants expressing the R-GECO1 sensor we performed a detailed  
184 investigation of the mIDA induced  $[\text{Ca}^{2+}]_{\text{cyt}}$  response in flowers at position 6 which is the position where  
185 initial cell wall loosening occurs. The AZ region was analyzed for signal intensity values and revealed that  
186 the  $\text{Ca}^{2+}$  signal was composed of one wave (Fig. 2, Movie 3). The signal initiated close to the nectaries  
187 and spread throughout the AZ and further into the floral receptacle. Flowers treated with 1  $\mu\text{M}$  IDA $\Delta$ N69  
188 did not show any increase in  $[\text{Ca}^{2+}]_{\text{cyt}}$  in the AZ or receptacle, while a clear  $\text{Ca}^{2+}$  wave could be detected  
189 in the whole AZ, receptacle and proximal pedicel after treatment with eATP (Sup Fig.7, Sup Movie 2).  
190 Detailed investigation of *HAE* and *HSL2* promoter activity in flowers at position 6 shows restricted  
191 promoter activity to the AZ cells (Fig. 2b). The observed promoter activity correlates with the observed  
192 mIDA induced  $[\text{Ca}^{2+}]_{\text{cyt}}$  response

### 193 **The ROS producing enzymes, RBOHD and RBOHF, are not involved in the developmental process of** 194 **abscission.**

195 ROS and  $\text{Ca}^{2+}$  are secondary messengers that can play a role in developmental processes involving cell  
196 wall remodeling, but are also important players in plant immunity (Kärkönen & Kuchitsu, 2015). We  
197 therefore set out to investigate if the IDA induced production of ROS and increase in  $[\text{Ca}^{2+}]_{\text{cyt}}$  function in  
198 the developmental process of abscission or if these signaling molecules form part of IDA modulated  
199 plant immunity.

200 The IDA induced  $\text{Ca}^{2+}$  response depends on  $\text{Ca}^{2+}$  from extracellular space (Sup Fig. 4b).  $\text{Ca}^{2+}$  transport  
201 over the plasma membrane is enabled by a variety of  $\text{Ca}^{2+}$  permeable channels, including the CYCLIC  
202 NUCLEOTIDE GATED CHANNELs (CNGCs). Various CNGCs are known to be involved in peptide ligand  
203 signaling in plants, including the involvement of CNGC6 and CNGC9 in CLAVATA3/EMBRYO  
204 SURROUNDING REGION40 signaling in roots (Breiden et al., 2021), and CNGC17 In phytosulfokine  
205 signaling (Ladwig et al., 2015). Using publicly available expression data we identified multiple CNGCs  
206 expressed in the AZ of Arabidopsis (Cai & Lashbrook, 2008) (Sup Fig. 8a, Sup Table. 3) and investigated  
207 if plants carrying mutations in the *CNGCs* genes expressed in AZs showed a defect in floral organ  
208 abscission. We observed no deficiency in floral abscission in the *cngc* mutants (Sup Fig. 8b), in contrast  
209 to what is observed in the *hae hsl2* mutant where all floral organs are retained throughout the  
210 inflorescence.  $\text{Ca}^{2+}$  partially activates members of the NOX family of nicotinamide adenine dinucleotide  
211 phosphate (NADPH) oxidases (RBOHs), key producers of ROS (Kadota et al., 2015). Two members of this  
212 family, *RBOHD* and *RBOHF* have high transcriptional levels in the floral AZs (Cai & Lashbrook, 2008) (Sup  
213 Fig. 8a, Sup Table. 3) and have been reported to be important in the cell separation event during floral  
214 abscission in Arabidopsis (Lee et al., 2018). We therefore set out to investigate if ROS production in AZ  
215 cells was dependent on RBOHD and RBOHF and to quantify to which degree these NADPH oxidases were  
216 necessary for organ separation. We treated AZs with the ROS indicator, H2DCF-DA, which upon contact  
217 with ROS has fluorescent properties, and observed ROS in both WT and to a lower extent in *rbohdf rbohdf*  
218 flowers. In addition, we observed normal floral abscission in the *rbohdf rbohdf* double mutant flowers,  
219 indicating that the developmental progression of cell separation is not dependent on RBOHD and RBOHF  
220 (Sup Fig. 8c,d). These results are in stark contrast to what has previously been reported, where cell  
221 separation during floral abscission was shown to be dependent on RBOHD and RBOHF (Lee et al., 2018).  
222 We used a stress transducer to quantify the force needed to remove petals, the petal breakstrength  
223 (pBS) (Stenvik et al., 2008), from the receptacle of gradually older flowers along the inflorescence of WT  
224 and *rbohdf rbohdf* flowers. Measurements showed a significant lower pBS value for the *rbohdf rbohdf*  
225 mutant compared to WT at the developmental stage where cell loosening normally occurs, indicating  
226 premature cell wall loosening (Sup Fig. 8e). Furthermore, *rbohdf rbohdf* petals abscised one position  
227 earlier than WT (Sup Fig. 8e). Similar to Crick et al 2022,, we found no RBOHD and RBOHF dependent  
228 delay or absence of cell separation during floral abscission (Crick et al., 2022). Due to a known function  
229 of IDA in inducing ROS production (Sup Fig. 1), these results points towards a role for IDA in modulating  
230 additional responses to the process of cell separation.

231

232



### 233 ***IDA* is upregulated by biotic and abiotic factors**

234 In *Arabidopsis*, infection with the pathogen *P.syringae* induces cauline leaf abscission. Interestingly,  
235 stress induced cauline leaf abscission was reduced in plants with mutations in components of the IDA-  
236 HAE/HSL2 signaling pathway (Patharkar et al., 2017; Patharkar & Walker, 2016). In addition,  
237 upregulation of defense genes in floral AZ cells during the abscission process is altered in the *hae hsl2*  
238 mutant (Cai & Lashbrook, 2008; Niederhuth et al., 2013), indicating that the IDA-HAE/HSL2 signaling  
239 system may be involved in regulating defense responses in cells undergoing cell separation. We further  
240 investigated if *IDA* is upregulated by biotic and abiotic elicitors. Transgenic plants containing the  $\beta$ -  
241 *glucuronidase* (*GUS*) gene under the control of the *IDA* promoter (*pIDA:GUS*) have previously been  
242 reported to exhibit *GUS* expression in cells overlaying newly formed LR primordia (Butenko et al., 2003;  
243 Kumpf et al., 2013). To investigate the expression of the *IDA* gene in response to biotic stress, *pIDA:GUS*  
244 seedlings were exposed to the bacterial elicitor flg22 and fungal chitin. Compared to the control  
245 seedlings, the seedlings exposed to flg22 and chitin showed a significant increase in *GUS* expression in  
246 LR primordia (Fig. 3a). Also, when comparing untreated root tips to those exposed to flg22 and chitin  
247 we observed a *GUS* signal in the primary root of flg22 and chitin treated roots (Fig. 3b). We used the  
248 fluorogenic substrate 4-methylumbelliferyl  $\beta$ -D-glucuronide (4-MUG) which is hydrolysed to the  
249 fluorochrome 4-methyl umbelliferone (4-MU) to quantify *GUS*-activity (Blazquez, 2007). A significant  
250 increase in fluorescence was observed for flg22 and chitin treated samples compared to untreated  
251 controls, (Fig. 3b), which was not observed when exposing seedlings to IDA $\Delta$ N69 indicating that  
252 increased *IDA* expression is not triggered simply by the application of a peptide (Fig. 3). Spatial *pIDA:GUS*  
253 expression was also monitored upon abiotic stress. When *pIDA:GUS* seedling were treated with the  
254 osmotic agent mannitol or exposed to salt stress by NaCl, both treatments simulating dry soil, a similar  
255 increment in *GUS* signal was observed surrounding the LR primordia (Fig. 3). However, no *pIDA:GUS*  
256 expression was detected in the primary root (Fig. 3b). Taken together these results indicate an  
257 upregulation of *IDA* in tissue involved in cell separation processes such as the LR primordia and,  
258 interestingly, the root cap upon biotic stress. The process of cell separation is a fast and time-restricted  
259 response where cells previously protected by outer cell layers are rapidly exposed to the environment.  
260 These cells need strong and rapid protection against the environment, and we therefore aimed to  
261 investigate if *IDA* is involved in modulating immune responses in addition to inducing ROS and  $[Ca^{2+}]_{cyt}$   
262 responses.

263

264

265



266 **mIDA can induce production of callose as a long term defense response**

267 We aimed to investigate a possible role of IDA in regulating long-term defense responses in the plant,  
268 such as the production of callose. Callose deposition is a resulting hallmark of the late plant immunity  
269 responses that together with other events such as stomatal closure and production of ethylene leads to  
270 inhibition of pathogen multiplication and containment of disease (reviewed in (Wang et al., 2021)).  
271 Callose deposition is highly increased in response to flg22 (Gómez-Gómez et al., 1999). Promoter activity  
272 studies of *pHAE* and *pHSL2* indicates a weak activity of the promoters in the cotyledons, (Sup Fig. 1d)  
273 and we thus treated WT seedlings with 1  $\mu$ M mIDA and measured the callose depositions per area in  
274 the cotyledons. We detected no difference to water treated controls indicating that either callose  
275 deposition is not a cellular outcome for mIDA treatment (Fig. 4a,b), or that receptor availability in the  
276 cotyledons is too low to observe a response We further tested if mIDA could induce callose depositions  
277 in cotyledons expressing the full length HAE receptor under a constitutive promoter (*35S:HAE-YFP*). An  
278 increase in the callose depositions per area upon mIDA treatment compared to water treated controls  
279 was observed in these lines (Fig. 4a,b). As a control, flg22 treated WT seedlings showed increased  
280 callose deposition, which was not observed in flg22 treated *fls2* seedlings (Fig. 4a,b). These results  
281 indicate that mIDA, is capable of promoting a HAE dependent deposition of callose as a long-term  
282 defense response.

283

284 **mIDA triggers expression of defense-associated marker genes associated with innate immunity.**

285 A well-known part of a plants immune response is the enhanced transcription of genes involved in  
286 immunity. Transcriptional reprogramming mostly mediated by WRKY transcription factors takes place  
287 during microbe-associated molecular pattern (MAMP)- triggered immunity and is essential to mount an  
288 appropriate host defense response (Birkenbihl et al., 2017). We selected well-established defense-  
289 associated marker genes: *FLG22-INDUCED RECEPTOR-LIKE KINASE1 (FRK1)*, a specific and early immune-  
290 responsive gene activated by multiple MAMPs (Asai et al., 2002; He et al., 2006), *MYB51*, a WRKY target  
291 gene, previously shown to increase in response to the MAMP flg22 (Frerigmann et al., 2016) resulting  
292 in biosynthesis of the secondary metabolite indolic glucosinolates; and an endogenous danger peptide,  
293 ELICITOR PEPTIDE 3 (PEP3) (Huffaker et al., 2006). Seven days-old WT seedlings treated with 1  $\mu$ M mIDA  
294 were monitored for changes in transcription of the aforementioned genes by RT-qPCR compared to  
295 untreated controls at two time points, 1 h and 12 h after treatment. All genes showed a significant  
296 transcriptional elevation 1 h after mIDA treatment (Fig. 5a). This in accordance with previous reports,  
297 where the expression of *FRK1* and *PEP3* was monitored in response to bacterial elicitors (He et al., 2006;  
298 Huffaker et al., 2006). After 12 h, *FRK1* and *PEP3* transcription in mIDA treated tissue was not

299 significantly different from untreated tissue; while transcription of *MYB51* in mIDA treated tissue  
300 remained elevated after 12 h but was significantly lower compared to 1 h after mIDA treatment (Fig.  
301 5a). Interestingly, the observed increase in transcription of the defense genes *MYB51* and *PEP3*, was  
302 only partially reduced in the *hae hsl2* mutant (Sup Fig. 9). In contrast, *FRK1* showed higher  
303 transcriptional levels in the *hae hsl2* mutant compared to WT (Sup Fig. 9). These results indicate that  
304 also other receptors than HAE and HSL2 are involved in the mIDA-induced enhancement of the defense  
305 genes *FRK1*, *MYB51* and *PEP3*.

306 We then analyzed a plant line expressing nuclear localized YFP from the *MYB51* promoter  
307 (*pMYB51:YFP<sup>N</sup>*) (Poncini et al., 2017) treated with mIDA. Enhanced expression of *pMYB51:YFP* was  
308 predominantly detected in the meristematic zone of the root after 7 h of mIDA treatment, compared to  
309 a non-treated control (Fig. 5b). Moreover, comparison of mIDA induction with the elicitor-triggered  
310 response of *pMYB51:YFP<sup>N</sup>* to flg22 showed similar temporal expression in the root (Sup Fig. 10) .  
311 Together, these data show that IDA can trigger a rapid increase in the expression of key genes involved  
312 in immunity. We next investigated if the mIDA induced transcription of defense related genes was  
313 similar to that induced by flg22. Seven days-old Col-0 WT seedlings were treated for 1h with mIDA, flg22  
314 or a combination of mIDA and flg22 to explore potential additive effects. The relative increase in  
315 transcription of the genes tested is similar when seedlings are treated with mIDA and flg22 (Fig. 6a).  
316 However, when treating seedlings with both peptides the relative transcription of the genes of interest  
317 increased substantially. To our surprise, the combined enhanced transcription when seedling where co-  
318 treated with both flg22 and mIDA exceeds a simple additive effect of the two peptides. To investigate if  
319 the observed increase is specific to a combination of mIDA and flg22, we investigated if co-treatment  
320 with mIDA and PIP1, an endogenous DAMP peptide known to amplify the immune response triggered  
321 by flg22, (Hou et al., 2014 ) gave a similar effect. Seedlings were treated for 1h with mIDA, PIP1 or a  
322 combination of the peptides to explore additive effects. In contrast to what we observed with flg22, no  
323 enhanced transcription of *FRK1*, *MYB51* and *PEP3* were observed after co-treatment with PIP1 and mIDA  
324 (Sup Fig. 11). These results suggest a role of IDA in enhancing the defense response triggered by flg22.  
325 To explore whether cells capable of undergoing cell separation in response to IDA and IDL peptides  
326 could be expressing *HAE* or *HSL2* in combination with *FLS2* we made transcriptional reporter lines  
327 expressing each of the receptors in fusion with either the nuclear localized YFP-derived fluorophore  
328 Venus protein or the RFP-derived Tomato protein (*pRECEPTOR:Venus/Tomato-H2B*) and crossed the  
329 lines to each other. Plants expressing both constructs were inspected for fluorescent nuclei in 7 day-old  
330 roots as well as in floral organs of floral position 7. Fluorescent nuclei with overlapping Venus and  
331 Tomato expression were observed both in the vascular tissue of the root, in cells surrounding LRs as  
332 well as in cells of the AZs of plants expressing *pFLS2-Venus-H2B* and *pHAE-Tomat-H2B* (Fig. 6b). Similar

333 observations were done in the AZ of lines expressing *pFLS2-Venus-H2B* and *pHSL2-Tomat-H2B* lines,  
334 however in these lines overlapping fluorescent nuclei in roots were mainly observed in the epidermal  
335 cells surrounding the LR and in the root tip, as well as in the root cap (Fig. 6c). Based on these results  
336 we propose a role for IDA in enhancing immune responses in tissue undergoing cell separation, possibly  
337 by enhancing cellular responses activated by immune receptors, such as FLS2.

338

### 339 Discussion:

340 Several plant species can abscise infected organs to limit colonization of pathogenic microorganisms  
341 thereby adding an additional layer of defense to the innate immune system (Kissoudis et al., 2016;  
342 Patharkar et al., 2017). Also, in a developmental context, there is an induction of defense associated genes  
343 in AZ cells during cell separation and prior to the formation of the suberized layer that functions as a barrier  
344 rendering protection to pathogen attacks (Cai & Lashbrook, 2008; Niederhuth et al., 2013; Roberts et al.,  
345 2000; I. Taylor & J. C. Walker, 2018). Interestingly, the induction of defense genes during floral organ  
346 abscission is altered in *hae hsl2* plants (Niederhuth et al., 2013). It is largely unknown how molecular  
347 components regulating cell separation and how the IDA-HAE/HSL2 signaling pathway, contributes to  
348 modulation of plant immune responses. Here we show that the mature IDA peptide, mIDA, is involved in  
349 activating known defense responses in Arabidopsis, including the production of ROS, the intracellular  
350 release of  $Ca^{2+}$ , the production of callose and the transcription of genes known to be involved in defense  
351 (Sup Fig. 1, Fig. 1, Fig. 2, Fig. 5). We suggest a role for IDA in ensuring optimal cellular responses in tissue  
352 undergoing cell separation, regulating both development and defense.

353

354 The intracellular event occurring downstream of IDA is still partially unknown. Here we report the  
355 release of cytosolic  $Ca^{2+}$  as a new signaling component. Roots and AZs expressing the  $Ca^{2+}$  sensor R-  
356 GECO1, showed a  $[Ca^{2+}]_{cyt}$  in response to mIDA. Moreover, the increased  $[Ca^{2+}]_{cyt}$  in response to mIDA in  
357 flowers occurred only at stages where cell separation was taking place, linking the observed  $[Ca^{2+}]_{cyt}$   
358 response to the temporal point of abscission and the need for an induced local defense response. During  
359 floral development the expression of the *HAE* and *HSL2* receptors increase prior to the onset of  
360 abscission (Cai & Lashbrook, 2008) and may account for the temporal mIDA induced  $[Ca^{2+}]_{cyt}$  response  
361 observed.

362 Based on these results, it is likely that the expression of the receptors is the limiting factor for a cells ability  
363 to respond to the mIDA peptide with a  $[Ca^{2+}]_{cyt}$  response. However, promoter activity of the receptors are  
364 observed in a broader area of the root than the observed  $[Ca^{2+}]_{cyt}$  response. As an example, *pHSL2* is found

365 to have a localized activation in the root tip, and when HSL2 is activated by IDL1 be involved in the  
366 regulation of cell separation during root cap sloughing (Shi et al., 2018). IDL1 and IDA have a high degree  
367 of similarity in the protein sequence, and *IDL1* expressed under the *IDA* promoter can fully rescue the  
368 abscission phenotype observed in the *ida* mutant (Stenvik et al., 2008). We can assume that IDL1 activates  
369 similar signaling components in the root cap as those used by IDA. Despite the expression of HSL2 and the  
370 involvement of the receptor in root cap sloughing, no  $[Ca^{2+}]_{cyt}$  response is observed in this region when  
371 plants are treated with the IDA peptide. The absence of an observed  $[Ca^{2+}]_{cyt}$  response in the root tip  
372 indicates that  $[Ca^{2+}]_{cyt}$  is most likely not involved in the cell separation process during root cap sloughing, or  
373 that cells involved in this process only are able to induce a  $[Ca^{2+}]_{cyt}$  response at a specific developmental  
374 time point. Thus, in addition to receptor availability, other factors must be involved in regulating the  $[Ca^{2+}]_{cyt}$   
375 response. It is intriguing that the mIDA cellular output is similar to that of flg22 (Kadota et al., 2015; Kadota  
376 et al., 2014) yet shows some distinct differences. The spatial distribution of the  $Ca^{2+}$  wave originated by  
377 mIDA differs from that of flg22. The *rbohD rbohF* mutant shows ROS production in the AZ, indicating that  
378 other NADPH oxidases or cell wall peroxidases expressed in the AZ may be involved in ROS production, in  
379 contrast to the importance of RBOHD RBOHF in flg22 signaling (Kadota et al., 2015). This suggests that while  
380 IDA and flg22 share many components for their signal transduction, such as the BAK1 co-receptor  
381 (Chinchilla et al., 2007; X. Meng et al., 2016) and MAPK cascade (Asai et al., 2002; Cho et al., 2008), there  
382 are other specific components that are likely important to provide differences in signaling. Despite the  
383 observation of the numerous defense related responses to mIDA, we cannot exclude that the mIDA induced  
384  $[Ca^{2+}]_{cyt}$  and rises in ROS levels may also have an intrinsic developmental role such as modulating cell wall  
385 properties and cell expansion similar to what is observed during FERONIA (FER) signaling (Dünser et al.,  
386 2019; Wei Feng et al., 2018). To further decipher the importance of the mIDA induced  $Ca^{2+}$  and ROS in  
387 defense it will be important to identify the specific signaling components responsible for this cellular output  
388 in addition to investigating the susceptibility of mutants to pathogen exposure.

389

390 Interestingly, FLS2 arrangement into nanoscale domains at the PM is dependent on FER. FLS2 becomes  
391 more disperse and mobile in *fer* mutants, implying a role for FER in regulating FLS2 activity (Gronnier et  
392 al., 2022). Also altering of the cell wall affects FLS2 nanoscale organization (McKenna et al., 2019).  
393 Formation of nanoscale domains containing the HAE and HSL2 receptors may be an important signaling  
394 step in the IDA-HAE/HSL2 signaling pathway. From our promoter analysis we clearly see overlapping  
395 activity of the *HAE* and *HSL2* promoters with the *FLS2* promoter *in planta*, providing the possibility that  
396 the receptors are localized at the PM of the same cells and can have coordinated signaling events. An  
397 intriguing thought is a possible co-localization of HAE and HSL2 with FLS2 in nanoscale domains, making  
398 a signaling unit possible to involve multiple different receptors responsible for the signaling outcome  
399 observed. In this paper, we show that co-treatment with mIDA and flg22 induces an enhanced

400 transcription of defense related genes. How FLS2, HAE and HSL2 communicate at the plasma membrane  
401 of the responsive cells may give the answers to the molecular mechanisms behind the augmented  
402 transcriptional regulation observed when co-treatment of mIDA and flg22 is performed (Fig. 6). We can  
403 investigate possible interaction partners of HAE and HSL2 looking at available data from a sensitized  
404 high-throughput interaction assay between extracellular domains (ECDs) of 200 Leucine Rich Repeat  
405 (LRR) (Smakowska-Luzan et al., 2018). Interestingly, LRR-RLKs known to play a function in biotic or  
406 abiotic stress responses, such as RECEPTOR-LIKE KINASE7 (RLK7), STRUBBELIG-RECEPTOR FAMILY3 ,  
407 RECEPTOR-LIKE PROTEIN KINASE 1 and FRK1, are found to interact mainly with HSL2, whereas HAE  
408 shows interaction with LRRs mainly involved in development (Sup Fig. 12). RLK7 has recently been  
409 identified as an additional receptor for CEP4, involved in regulating cell surface immunity and response  
410 to nitrogen starvation, indicating a role of RLK7 as an additional receptor regulating defense responses  
411 in known peptide-receptor complexes (Rzemieniewski et al., 2022). It would be interesting to investigate  
412 a possible role of RLK7 in IDA-HAE/HSL2 signaling as a signaling partner in the observed IDA-induced  
413 defense responses.

414 In this paper, we propose a model where the IDA-HAE/HSL2 signaling pathway modulates defense  
415 responses in tissues undergoing cell separation. It is beneficial for the plant to ensure an upregulation  
416 of defense responses in tissues undergoing cell separation as a precaution against pathogen attack. This  
417 tissue is a major entry route for pathogens, and by combining the need of both the IDA peptide and the  
418 pathogen molecular pattern, such as flg22, for the induction of a strong defense response, the plant  
419 ensures maximum immunity in the most prone cells without spending energy inducing this in all cells  
420 (Fig. 7). Such a molecular mechanism, where the presence of mIDA in tissue exposed to stress leads to  
421 maximum activation of the immune responses, will ensure maximal protection of infected cells during  
422 cell separation, cells which are major potential entry routes for invading pathogens.

## 423 **Movies**

424 **Movie 1:**  $[Ca^{2+}]_{cyt}$  dynamics in R-GECO1 expressing root tip in response to 1  $\mu$ M mIDA. 10 days-old roots  
425 were treated with 1  $\mu$ M mIDA and changes in  $[Ca^{2+}]_{cyt}$  was recorded over time. Response shown as  
426 normalized fluorescence intensities ( $\Delta F/F$ ). Images were recorded with a frame rate of 5 seconds. Movie  
427 corresponds to measurements shown in Fig. 1a. Representative response from 10 roots. Time shown as,  
428 hh:mm:ss.

429  
430 **Movie 2:**  $[Ca^{2+}]_{cyt}$  dynamics in R-GECO1 expressing root tip in response to 1  $\mu$ M flg22 10 days-old roots were  
431 treated with 1  $\mu$ M flg22 and changes in  $[Ca^{2+}]_{cyt}$  was recorded over time. Response shown as normalized  
432 fluorescence intensities ( $\Delta F/F$ ). Images were recorded with a frame rate of 5 seconds. Movie corresponds  
433 to measurements shown in Fig. 1b. Representative response from 7 roots. Time shown as, hh:mm:ss.

434  
435 **Movie 3:**  $[Ca^{2+}]_{cyt}$  dynamics in R-GECO1 expressing AZ in response to 1  $\mu$ M mIDA. Flowers at position 6 were  
436 treated with 1  $\mu$ M mIDA and changes in  $[Ca^{2+}]_{cyt}$  was recorded over time. Response shown as normalized  
437 fluorescence intensities ( $\Delta F/F$ ). Images were recorded with a frame rate of 5 seconds. Movie corresponds  
438 to measurements shown in Fig. 2a. Representative response from 8 flowers. Time shown as, hh:mm:ss.  
439  
440 **Sup Movie 1:**  $[Ca^{2+}]_{cyt}$  dynamics in R-GECO1 expressing root tip in response to 1 mM eATP. 1 mM eATP will  
441 induce a strong increase in  $[Ca^{2+}]_{cyt}$  and was added as a last treatment to all roots acting as a positive control.  
442 Response shown as normalized fluorescence intensities ( $\Delta F/F$ ). Images were recorded with a frame rate of  
443 5 seconds. Movie corresponds to measurements shown in Fig. 1a. Representative response from 10 roots.  
444 Time shown as, hh:mm:ss.  
445  
446 **Sup Movie 2:**  $[Ca^{2+}]_{cyt}$  dynamics in R-GECO1 expressing AZ in response to to 1  $\mu$ M of the inactive IDA peptide,  
447 IDA<sup>AN69</sup>. Flowers at position 6 were treated with 1  $\mu$ M IDA<sup>AN69</sup> and changes in  $[Ca^{2+}]_{cyt}$  was recorded over  
448 time. Response shown as normalized fluorescence intensities ( $\Delta F/F$ ). Images were recorded with a frame  
449 rate of 5 seconds. Movie corresponds to measurements shown in Sup Fig. 6. Representative response from  
450 7 flowers. Time shown as, hh:mm:ss.

451  
452  
453

## 454 Methods

### 455 Accession numbers of genes studied in this work:

456 HSL2 At5g65710, IDA At1g68765, FLS2 At5g46330, HAE At4g28490, MYB51 At1g18570, RBOHD  
457 At5g47910, RBOHF At1g64060, PEP3 At5g64905, WRKY33 At2g38470, FRK1 At2g19190. Plant lines used  
458 in this work: Ecotype Colombia-0 (Col-0) was used as wild type (WT). Mutant line: *hae* (SALK\_021905),  
459 *hsl2*, (SALK\_030520), *fls2* (SALK\_062054), *rboh* (SALK\_070610), *rboh* (SALK\_059888), *cngc1*  
460 (SAIL\_443), *cngc2* (SALK\_066908), *cngc4* (SALK\_081369), *cngc5* (SALK\_149893), *cngc6* (SALK\_064702),  
461 *cngc9* (SAIL\_736), *cngc12* (SALK\_093622). SALK lines were provided from Nottingham Arabidopsis Stock  
462 Centre (NASc).

### 463 Plant lines

464 The pIDA:GUS, pHSL2:Venus-H2B and pMYB51:YFPN lines have been described previously (Kumpf et al.,  
465 2013; Poncini et al., 2017; Shi et al., 2018). The promoters of HAE (1601 bp (Kumpf et al., 2013) and HSL2

466 (2300 bp (Sto et al., 2015)) were available in the pDONRZeo vector (Thermo Fischer Scientific).  
467 Sequences corresponding to the FLS2 promoter (988 bp (Robatzek et al., 2006)) were amplified from  
468 WT DNA (primers are listed in table 2) and cloned into the pDONRZeo vector (Thermo Fischer Scientific).  
469 All promoter constructs were further recombined into the promoter:Venus (YFP)-H2B and Tomato-H2B  
470 destination vectors (Somssich et al., 2016) using the Invitrogen Gateway cloning system (Thermo Fischer  
471 Scientific). Constructs were transformed into *Agrobacterium tumefaciens* (A.tumefaciens) C58 and the  
472 floral dip method (Clough & Bent, 1998) was used to generate transgenic lines. Single-copy homozygous  
473 plant lines were selected and used in this study. The CDS of HAE was cloned into the pEarleyGate101  
474 destination vector (Earley et al., 2006) using the Invitrogen Gateway cloning system and transformed  
475 into A.tumefaciens C58 and further used to generate the *35S:HAE:YFP* lines.

#### 476 Growth conditions

477 Plants were grown in long day conditions (8 h dark and 16 h light) at 22 °C. Seeds were surface sterilized  
478 and plated out on MS-2 plates, stratified for 24 h at 4 °C and grown on plates for 7 days before  
479 transferred to soil.

#### 480 Peptide sequences

481 Peptides used in this study were ordered from BIOMATIK. Peptide sequences are listed in  
482 Supplementary Table 1.

#### 483 Primers

484 Primers for genotyping and generation of constructs were generated using VectorNTI. Gene specific  
485 primers for RT-qPCR were generated using Roche Probe Library Primer Design. All primers are listed in  
486 Supplementary Table 2.

#### 487 Histochemical GUS assay

488 Seven days-old seedlings were pre-incubated for 12 h in liquid MS-2 medium containing stimuli of  
489 interest; 1 µM peptide (table 1), 60 mM Mannitol (M4125 – Sigma), 20 µg/mL Chitin (C9752 – Sigma),  
490 50 mM NaCl and then stained for GUS activity following the protocol previously described (Stenvik et  
491 al., 2008). Roots were pictured using a Zeiss Axioplan2 microscope with an AxioCam HRc, 20x air  
492 objective. The assay was performed on 10 individual roots and the experiment was repeated 3 times.

#### 493 Fluorescent GUS assay

494 Seven days-old seedlings were pre-incubated for 12 h in liquid MS-2 medium with or without stimuli of  
495 interest; 1 µM peptide (table 1), 60 mM Mannitol (M4125 – Sigma), 20 µg/mL Chitin (C9752 – Sigma),



496 50 mM NaCl. After treatment, 10 seedlings were incubated in wells containing 1 mL reaction mix  
497 described in (Blazquez, 2007) containing: 10 mM EDTA (pH 8.0), 0,1 % SDS, 50 mM Sodium Phosphate  
498 (pH 7.0), 0,1 % Triton X-100, 1 mM 4-MUG (, M9130-Sigma) and incubated at 37 °C for 6 h. Six 100 µl  
499 aliquots from each well were transferred to individual wells in a microtiter plate and the reaction was  
500 stopped by adding 50 µl of stop reagent (1 M Sodium Carbonate) to each well. Fluorescence was  
501 detected by the use of a Wallac 1420 VICTOR2 microplate luminometer (PerkinElmer) using an  
502 excitation wavelength of 365 nm and a filter wavelength of 430 nm. Each experiment was repeated 3  
503 times.

#### 504 Confocal laser microscopy of roots and flowers expressing promoter:Venus/YFP-H2B and promoter: 505 Tomato-H2B construct

506 Imaging of 7 days-old roots was performed on a LSM 880 Airyscan confocal microscope equipped with  
507 two flanking PMTs and a central 32 array GaAsP detector. Images were acquired with Zeiss Plan-  
508 Aplanachromat 20x/0.8 WD=0.55 M27 objective and excited with laser light of 405 nm, 488 nm and 561  
509 nm. Roots were stained by 1 µM propidium iodide for 10 min and washed in dH<sub>2</sub>O before imaging.  
510 Imaging of flowers was performed on an Andor Dragonfly spinning disk confocal using an EMCCD iXon  
511 Ultra detector. Images were acquired with a 10x plan Apo NA 0,45 dry objective and excited with laser  
512 light of 405 nm, 488 nm and 561 nm. Maximum intensity projections of z-stacks were acquired with  
513 step size of 1,47 µm. Image processing was performed in FIJI 51. These steps are: background  
514 subtraction, gaussian blur/smooth, brightness/contrast. Imaging was performed at the NorMIC Imaging  
515 platform.

516

#### 517 Calcium imaging using the R-GECO1 sensor

518 [Ca<sup>2+</sup>]<sub>cyt</sub> in roots were detected using WT plants expressing the cytosolic localized single-fluorophore  
519 based Ca<sup>2+</sup> sensor, R-GECO1 in Col-0 background (Keinath et al., 2015). Measurements were performed  
520 using a confocal laser scanning microscopy Leica TCS SP8 STED 3X using a 20x multi NA 0.75 objective.  
521 Images were recorded with a frame rate of 5 seconds at 400 Hz. Seedling mounting was performed as  
522 described in (Krebs & Schumacher, 2013). The plant tissues were incubated overnight in half strength  
523 MS, 21°C and continuous light conditions before the day of imaging. [Ca<sup>2+</sup>]<sub>cyt</sub> in the abscission zone were  
524 detected using WT plants expressing R-GECO1 (Keinath et al., 2015). Abscission zones of position 7 were  
525 used. Mounting of the abscission zones were performed using the same device as for seedlings (Krebs  
526 & Schumacher, 2013). The abscission zones were incubated in half strength MS medium for 1 h before  
527 imaging. Measurements were performed with a Zeiss LSM880 Airyscan using a Plan-Apochromat 10x

528 air NA 0.30 objective. Images were recorded with a frame rate of 10 seconds. R-GECO1 was excited  
529 with a white light laser at 561 nm and its emission was detected at 590 nm to 670 nm using a HyD  
530 detector. Laser power and gain settings were chosen for each experiment to maintain comparable  
531 intensity values. For mIDA and flg22 two-fold concentrations were prepared in half strength MS. mIDA  
532 or flg22 were added in a 1:1 volume ratio to the imaging chamber (final concentration 1  $\mu$ M). ATP was  
533 prepared in a 100-fold concentration in half strength MS and added as a last treatment in a 1:100  
534 volume ratio (final concentration 1 mM) to the imaging chamber as a positive control for activity of the  
535 R-GECO1 sensor (Movie 3). Image processing was performed in FIJI. These steps are: background  
536 subtraction, gaussian blur, MultiStackReg v1.45 (<http://bradbusse.net/sciencedownloads.html>), 32-bit  
537 conversion, threshold. Royal was used as a look up table. Fluorescence intensities of indicated ROIs were  
538 obtained from the 32-bit images (Krebs & Schumacher, 2013). Normalization was done using the  
539 following formula  $\Delta F/F = (F-F_0)/F_0$  where  $F_0$  represents the mean of at least 1 min measurement  
540 without any treatment. R-GECO1 measurements were performed at the Center for Advanced imaging  
541 (CAi) at HHU and at NorMIC Imaging platform at the University of Oslo.

#### 542 Calcium measurements using the Aequorin (pMAQ2) sensor

543  $[Ca^{2+}]_{cyt}$  in seedlings and flowers were detected using WT plants expressing p35S-apoaequorin (pMAQ2)  
544 located to cytosol (Aeq) (Knight et al., 1991; Ranf et al., 2011). Aequorin luminescence was measured  
545 as previously described (Ranf et al., 2012). Emitted light was detected by the use of a Wallac 1420  
546 VICTOR2 microplate luminometer (PerkinElmer). Differences in Aeq expression levels due to seedling  
547 size and expression of sensor were corrected by using luminescence at specific time point (L)/Max  
548 Luminescence (Lmax). Lmax was measured after peptide treatment by individually adding 100  $\mu$ L 2 M  
549  $CaCl_2$  to each well and measuring luminescence constantly for 180 seconds (Ranf et al., 2012). 2 M  $CaCl_2$   
550 disrupts the cells and releases the Aeq sensor into the solution where it will react with  $Ca^{2+}$  and release  
551 the total possible response in the sample (Lmax) in form of a luminescent peak. A final concentration of  
552 1  $\mu$ M mIDA was added to each wells at the start of measurements. For inhibitor treatments, Aeq-  
553 seedlings were incubated in in 2 mM EGTA (Sigma-Aldrich) or 1 mM  $LaCl_3$  (Sigma-Aldrich) O/N before  
554 measurements. For seedlings 3 independent experiments were performed with 12 replications in each  
555 experiment. For flowers 3 independent experiments were performed with 4-6 replications in each  
556 experiment.

#### 557 Measurements of reactive oxygen species (ROS)

558 ROS production was monitored by the use of a luminol-dependent assay as previously described  
559 (Butenko et al., 2014) using a Wallac 1420 VICTOR2 microplate luminometer (PerkinElmer). Arabidopsis  
560 leaves expressing *35S:HAE:YFP* were cut into leaf discs and incubated in water overnight before

561 measurements. A final concentration of 1  $\mu$ M mIDA was added to each well at the start of  
562 measurements. All measurements were performed on 6 leaf discs and each experiment was repeated  
563 3 times.

#### 564 ROS stain (H2DCF-DA)

565 Flowers at position 6 were gently incubated in staining solution (25  $\mu$ M (2',7'-dichlorodihydrofluorescein  
566 diacetate) (H2DCF-DA) (Sigma-Aldrich, D6883), 50 mM KCL, 10 mM MES) for 10 min and further washed  
567 3 times in wash solution (50 mM KCL, 10 mM MES). For the *hae hsl2* mutant the floral organs were  
568 forcibly removed immediately before imaging. Imaging was done using a Dragonfly Airy scan spinning  
569 disk confocal microscope, excited by a 488 nm laser. A total of 9 flowers per genotype were imaged.  
570 The experiment was repeated 2 independent times.

#### 571 Callose deposition staining and quantification

572 Callose deposition experiments were conducted as per (Luna et al., 2011) with modifications. Seeds  
573 from WT and *fls2* were vapor-phase sterilized for 4 h. Seeds were transferred to 12-well plates  
574 containing 1 mL of filter-sterilized MS medium and 0.5 % MES with a final pH of 5.7, and stratified in  
575 the dark at 4 °C for 2 days. Plates were consecutively transferred to a growth chamber with 16 h of light  
576 (150 $\mu$ E m<sup>-2</sup> s<sup>-1</sup>)/8h darkness cycle at 22°C. On the seventh day, growth medium was refreshed under  
577 sterile conditions. On the eighth day the treatments were applied: addition of 10  $\mu$ L of water (mock); 10  
578  $\mu$ L of 100  $\mu$ M flg22; or 10  $\mu$ L of 100  $\mu$ M mIDA (final peptide concentrations of 1  $\mu$ M). After 24 h the  
579 growth medium was replaced with 95% ethanol and incubated overnight. Ethanol was replaced with  
580 an 8 M NaOH softening solution and incubated for 2 h. Seedlings were washed 3 times in water and  
581 immediately transferred to the aniline blue staining solution (100 mM KPO<sub>4</sub>-KOH, pH 11; 0.01 % aniline  
582 blue). After 2 h of staining, the seedlings were mounted on 50 % glycerol and imaged under a ZEISS  
583 epifluorescence microscope with UV filter (BP 365/12 nm; FT 395 nm; LP 397 nm). Image analysis was  
584 performed on FIJI (Schindelin et al., 2012). In brief, cotyledons were cropped and measured the leaf  
585 area. Images were thresholded to remove autofluorescence and area of depositions measured to  
586 calculate the ratio of callose deposition area per cotyledon area unit. Between 9-12 seedlings were  
587 analyzed per genotype x treatment combination.

#### 588 Real time quantitative PCR (RT-qPCR)

589 Seven days-old Arabidopsis seedlings (WT, *hae hsl2*) grown vertically on ½ sucrose MS-2 plates were  
590 transferred to liquid ½ MS-2 medium (non-treated) and liquid ½ MS-2 medium containing 1  $\mu$ M peptide  
591 (Supplementary Table 1) and incubated in growth chambers for 1 h or 12 h. Seedlings were flash-frozen  
592 in liquid nitrogen before total RNA was extracted using Spectrum™ Plant Total RNA Kit (SIGMA Aldrich).

593 cDNA synthesis was performed as previously described (Grini et al., 2009). RT-qPCR was performed  
594 according to protocols provided by the manufacturer using FastStart Essential DNA Green Master  
595 (Roche) and LightCycler96 (Roche) instrument. ACTIN2 was used to normalize mRNA levels as described  
596 in (Grini et al., 2009). Two-three biological replicates and 4 technical replicates including standard curves  
597 were performed for each sample.

#### 598 Petal Break strength (pBS)

599 The force required to remove a petal at a given position on the inflorescence was measured in gram  
600 equivalents using a load transducer as previously described (Stenvik et al., 2008). Plants were grown  
601 until they had at least 15 positions on the inflorescence. A minimum of 15 petals per position were  
602 measured. pBS measurements were performed on WT, *rboh*d *rboh*f (SALK\_070610 SALK\_059888) and  
603 *hae hsl*2 (SALK\_021905 SALK\_030520) plants.

#### 604 Statistical methods

605 Two tailed students t-test ( $p < 0.05$ ) was used to identify significant differences in the fluorescent GUS  
606 assay by comparing treated samples to untreated samples of the same plant line. Statistical analysis of  
607 the RT-qPCR results was performed on all replicas using ONE-WAY or TWO-WAY ANOVA (as stated in  
608 the figure text) and post-hoc Tukey's test ( $p < 0.05$ ). Two tailed students t-test with ( $p < 0.05$ ) was used  
609 in the petal break strength (pBS) measurements to identify significant differences from WT at a given  
610 position on the inflorescence.

611

#### 612 Acknowledgements

613 We thank M.K. Anker, I.M. Stø, V. Iversen and R. Falleth for technical assistance in the laboratory and  
614 phytotrone. We thank the NorMic Imaging platform for the use and technical support. This work was  
615 supported by the Research Council of Norway (grant 230849) to V.O.Lalun and M.A. Butenko Work by R.  
616 Simon and and M. Breiden was supported through CEPLAS.

617

#### 618 Author contributions

619 V.O.L generated Arabidopsis lines and constructs, tested IDA expression to biotic and abiotic stress,  
620 performed gene expression studies, callose deposition assays, phenotypic analysis of mutants and ROS  
621 measurements. V.O.L and M.B. performed  $Ca^{2+}$  measurements. V.O.L, S. G-T., M.B., R.S and M.A.B

622 designed experiments, analyzed data, and drafted the manuscript. V.O.L and M.A.B wrote the paper  
623 with input from all authors.

624

### 625 Competing interests

626 The authors have no competing interests.

### 627 Materials and correspondence

628 Correspondence to Melinka A. Butenko, [m.a.butenko@ibv.uio.no](mailto:m.a.butenko@ibv.uio.no)

629

630

## 631 **Supplementary Tables**

### 632 **Sup Table. 1: Peptide sequences**

| Peptide                                      | Amino acid sequence             |
|----------------------------------------------|---------------------------------|
| mIDA                                         | PIPPSA $\circ$ SKRHN            |
| flg22                                        | QRLSTGSRINS $\circ$ AKDDAAGLQIA |
| <i>IDA</i> <sup><math>\Delta</math>N69</sup> | PIPPSA $\circ$ SKRRH            |
| PIP1                                         | RFVKHSG $\circ$ SPSGPGH         |

633 ( $\circ$  = hydroxyproline)

634

### 635 **Sup Table. 2: Primers sequences and function**

| Function              | Primer name           | Primer sequence 5'-3'             |
|-----------------------|-----------------------|-----------------------------------|
| Cloning promoter FLS2 | PromFLS2 -988bp Attb1 | 5'GGGGACAAGTTTGTACAAAAAAGCAGGCTTA |
|                       |                       | GAAGTTGTGAATTGTGAT'3              |
| Cloning promoter FLS2 | PromFLS2 -988bp Attb2 | 5'GGGGACCACTTTGTACAAGAAAGCTGGGTA  |
|                       |                       | GGTTTAGACTTTAGAAGA'3              |

|                                |                     |                                |
|--------------------------------|---------------------|--------------------------------|
| Genotype hsl2                  | Hsl2 LP             | 5'CGTCTTGAGCTAGCCAACAAC'3      |
| Genotype hsl2                  | Hsl2 RP             | 5'GTCCAATCAAGTGGAGAAACG'3      |
| Genotype hae                   | Haesa LP            | 5'CACCTTCCTTCTCTCCATTCC'3      |
| Genotype hae                   | Haesa RP            | 5'GTTGAGAGAAGTGACAAGCGAG'3     |
| Genotype SALK-lines            | Lbb1-               | 5'GCGTGGACCGCTTGCTGCAACT'3     |
| Genotype rbohD<br>SALK_070610C | LP_SALK_070610C     | 5'TTTCAACGCCTTTTGGTACAC'3      |
| Genotype rbohD<br>SALK_070610C | RP_SALK_070610C     | 5'GTTACCTATTCTTTTGCCGGG'3      |
| Genotype rbohF<br>SALK_059888  | LP_SALK_059888      | 5'CAAAGAGCTCTTCGTGGTTTG'3      |
| Genotype rbohF<br>SALK_059888  | RP_SALK_059888      | 5'TCTCTATTGTATCTTGTGTCACCG'3   |
| Genotype fls2 SALK_062054      | FLS2_SALK_062054 Fw | 5'GGTTCGATTCCTTCTGGAATC'3      |
| Genotype fls2 SALK_062054      | FLS2_SALK_062054 Rv | 5'CCTGAGTTTTTGAAGCTTCCC'3      |
| qPCR                           | 33.FRK1 Fw          | 5'AACTTAGGAGACTATTTGGCAGGTAA'3 |
| qPCR                           | 33.FRK1 Rv          | 5'TGCATCTAATGATATCTTCAACCTCT'3 |
| qPCR                           | 63.PEP3 Fw          | 5'GCGAGGAAGATGAGAGTATCG'3      |
| qPCR                           | 63.PEP3 Rv          | 5'TCAATGGTCATGCCATCTTCT'3      |
| qPCR                           | 91.MYB51 Fw         | 5'GGCCAATTATCTTAGACCTGACA'3    |
| qPCR                           | 91.MYB51 Rv         | 5'CCACGAGCTATAGCAGACCATT'3     |
| qPCR reference gene            | act2int2 sense      | 5'CCCTGAGGAGCACCCAGTTCTACTC'3  |
| qPCR reference gene            | act2int2 antisense  | 5'CCGCAAGATCAAGACGAAGGATAGC'3  |

636

637

638 **Sup Table. 3: Relative expression of genes of the CNGC and RBOH gene families during the onset of**  
 639 **abscission** (data from (Cai & Lashbrook, 2008)). See Sup Fig. 5a for flower developmental stages (p2-  
 640 p6). CNGC = CYCLIC NUCLEOTIDE GATED CHANNEL, RBOH = RESPIRATORY BURST OXIDASE PROTEIN,  
 641 IDA = INFLORESCENCE DEFICIENT IN ABSCISSION, HSL2 = HAESA-LIKE 2.

642

| <i>Locus ID</i>                       | <i>Name/Flower developmental stages</i> | p2       | p3       | p4       | p5       | p6       |
|---------------------------------------|-----------------------------------------|----------|----------|----------|----------|----------|
| <b>CNGCs</b>                          |                                         |          |          |          |          |          |
| <i>At5g53130</i>                      | <i>CNGC1</i>                            | 291,9217 | 310,4919 | 495,7432 | 478,204  | 469,1732 |
| <i>At5g15410</i>                      | <i>CNGC2</i>                            | 1052,741 | 707,3286 | 626,9068 | 564,8327 | 557,5938 |
| <i>At5g54250</i>                      | <i>CNGC4</i>                            | 123,1472 | 193,9821 | 166,5376 | 176,2532 | 152,5896 |
| <i>At5g57940</i>                      | <i>CNGC5</i>                            | 691,9364 | 691,89   | 689,136  | 693,1147 | 396,6692 |
| <i>At2g23980</i>                      | <i>CNGC6</i>                            | 378,221  | 537,386  | 463,2181 | 502,9967 | 418,4082 |
| <i>At1g15990</i>                      | <i>CNGC7</i>                            | 42,53905 | 4,013366 | 3,253884 | 4,808204 | 7,830878 |
| <i>At1g19780</i>                      | <i>CNGC8</i>                            | 127,1805 | 63,14431 | 12,499   | 26,13849 | 11,25919 |
| <i>At4g30560</i>                      | <i>CNGC9</i>                            | 1115,91  | 673,8271 | 209,3169 | 197,1013 | 218,3005 |
| <i>At1g01340</i>                      | <i>CNGC10</i>                           | 92,29875 | 237,8649 | 115,0834 | 167,9021 | 116,888  |
| <i>At2g46440;</i><br><i>At2g46430</i> | <i>CNGC11; CNGC3</i>                    | 3,751632 | 19,02687 | 101,7517 | 75,33781 | 97,46469 |
| <i>At2g46450</i>                      | <i>CNGC12</i>                           | 73,57635 | 154,3836 | 194,2215 | 256,2537 | 199,3865 |
| <i>At4g01010</i>                      | <i>CNGC13</i>                           | 26,81946 | 27,13074 | 36,37046 | 13,7691  | 35,73786 |
| <i>At2g24610</i>                      | <i>CNGC14</i>                           | 24,62137 | 24,55057 | 37,37278 | 32,75482 | 26,07159 |
| <i>At2g28260</i>                      | <i>CNGC15</i>                           | 26,53137 | 39,16623 | 21,37623 | 29,06457 | 22,87302 |
| <i>At3g48010</i>                      | <i>CNGC16</i>                           | 40,68595 | 12,40819 | 1,003874 | 1,432107 | 6,756874 |
| <i>At4g30360</i>                      | <i>CNGC17</i>                           | 127,9115 | 162,4681 | 216,6674 | 191,8812 | 157,5401 |
| <i>At5g14870</i>                      | <i>CNGC18</i>                           | 189,1577 | 98,09141 | 37,70282 | 29,79446 | 15,07226 |
| <i>At3g17690</i>                      | <i>CNGC19</i>                           | 4,532605 | 1,830825 | 5,04741  | 5,905303 | 3,699505 |
| <i>At3g17700</i>                      | <i>CNGC20</i>                           | 52,89588 | 94,00054 | 107,4842 | 78,12915 | 40,67315 |
| <b>RBOHs</b>                          |                                         |          |          |          |          |          |
| <i>At5g07390</i>                      | <i>RBOHA</i>                            | 4,185314 | 3,00695  | 3,438994 | 3,472965 | 3,41175  |
| <i>At1g09090</i>                      | <i>RBOHB</i>                            | 1,006999 | 1,055189 | 1,824025 | 1,175719 | 1,696683 |
| <i>At5g51060</i>                      | <i>RBOHC</i>                            | 20,71598 | 69,57144 | 13,97975 | 9,319057 | 8,847032 |
| <i>At5g60010</i>                      | <i>RBOHD</i>                            | 1150,998 | 603,4534 | 601,9696 | 805,7448 | 885,5323 |
| <i>At1g19230</i>                      | <i>RBOHE</i>                            | 7,372654 | 6,069166 | 4,934652 | 9,946411 | 6,019031 |
| <i>At1g64060</i>                      | <i>RBOHF</i>                            | 200,0895 | 222,463  | 297,3    | 449,7607 | 873,9841 |
| <i>At4g25090</i>                      | <i>RBOHG</i>                            | 4,048472 | 3,046103 | 3,217067 | 2,755258 | 5,142675 |
| <i>At5g60010</i>                      | <i>RBOHH</i>                            | 94,40216 | 65,08288 | 18,12167 | 26,1705  | 18,26213 |
| <i>At4g11230</i>                      | <i>RBOHI</i>                            | 11,76717 | 10,91102 | 17,55314 | 17,93307 | 11,61079 |
| <i>At3g45810</i>                      | <i>RBOHJ</i>                            | 99,10577 | 95,51017 | 71,29349 | 66,03646 | 63,07515 |
| <b>IDA signaling pathway</b>          |                                         |          |          |          |          |          |
| <i>At1g68765</i>                      | <i>IDA</i>                              | 8,245425 | 6,850307 | 32,37852 | 224,6666 | 1268,797 |



|                  |              |          |          |          |          |          |
|------------------|--------------|----------|----------|----------|----------|----------|
| <i>At4g28490</i> | <i>HAESA</i> | 336,4576 | 811,4685 | 4950,168 | 6327,225 | 8082,581 |
| <i>At5g65710</i> | <i>HSL2</i>  | 2517,483 | 4441,616 | 7633,162 | 8056,462 | 7993,356 |

643

644

645 **References:**

- 646 Agustí, J., Merelo, P., Cercós, M., Tadeo, F. R., & Talón, M. (2009). Comparative transcriptional survey  
647 between laser-microdissected cells from laminar abscission zone and petiolar cortical tissue  
648 during ethylene-promoted abscission in citrus leaves. *BMC Plant Biology*, *9*(1), 127.  
649 <https://doi.org/10.1186/1471-2229-9-127>
- 650 Asai, T., Tena, G., Plotnikova, J., Willmann, M. R., Chiu, W. L., Gomez-Gomez, L., Boller, T., Ausubel, F.  
651 M., & Sheen, J. (2002). MAP kinase signalling cascade in Arabidopsis innate immunity. *Nature*,  
652 *415*(6875), 977-983. <https://doi.org/10.1038/415977a>
- 653 Birkenbihl, R. P., Kracher, B., & Somssich, I. E. (2017). Induced Genome-Wide Binding of Three  
654 Arabidopsis WRKY Transcription Factors during Early MAMP-Triggered Immunity. *Plant Cell*,  
655 *29*(1), 20-38. <https://doi.org/10.1105/tpc.16.00681>
- 656 Blazquez, M. (2007). Quantitative GUS Activity Assay in Intact Plant Tissue. *CSH Protoc*, *2007*,  
657 [pdb.prot4688](https://doi.org/10.1101/pdb.prot4688). <https://doi.org/10.1101/pdb.prot4688>
- 658 Bleecker, A. B., & Patterson, S. E. (1997). Last exit: senescence, abscission, and meristem arrest in  
659 Arabidopsis. *Plant Cell*, *9*(7), 1169-1179. <https://doi.org/10.1105/tpc.9.7.1169>
- 660 Breiden, M., Olsson, V., Blümke, P., Schlegel, J., Gustavo-Pinto, K., Dietrich, P., Butenko, M. A., & Simon,  
661 R. (2021). The Cell Fate Controlling CLE40 Peptide Requires CNGCs to Trigger Highly Localized  
662 Ca<sup>2+</sup> Transients in Arabidopsis thaliana Root Meristems. *Plant Cell Physiol*, *62*(8), 1290-1301.  
663 <https://doi.org/10.1093/pcp/pcab079>
- 664 Butenko, M. A., Patterson, S. E., Grini, P. E., Stenvik, G.-E., Amundsen, S. S., Mandal, A., & Aalen, R. B.  
665 (2003). *INFLORESCENCE DEFICIENT IN ABCISSION* Controls Floral Organ Abscission in  
666 Arabidopsis and Identifies a Novel Family of Putative Ligands in Plants. *Plant Cell*, *15*, 2296-  
667 2307.
- 668 Butenko, M. A., Wildhagen, M., Albert, M., Jehle, A., Kalbacher, H., Aalen, R. B., & Felix, G. (2014). Tools  
669 and Strategies to Match Peptide-Ligand Receptor Pairs. *Plant Cell*, *26*(5), 1838-1847.  
670 <https://doi.org/10.1105/tpc.113.120071>
- 671 Cai, S., & Lashbrook, C. C. (2008). Stamen abscission zone transcriptome profiling reveals new  
672 candidates for abscission control: enhanced retention of floral organs in transgenic plants  
673 overexpressing Arabidopsis ZINC FINGER PROTEIN2. *Plant Physiol*, *146*(3), 1305-1321.  
674 <https://doi.org/10.1104/pp.107.110908>
- 675 Castro, B., Citterico, M., Kimura, S., Stevens, D. M., Wrzaczek, M., & Coaker, G. (2021). Stress-induced  
676 reactive oxygen species compartmentalization, perception and signalling. *Nat Plants*, *7*(4),  
677 403-412. <https://doi.org/10.1038/s41477-021-00887-0>
- 678 Chinchilla, D., Zipfel, C., Robatzek, S., Kemmerling, B., Nurnberger, T., Jones, J. D., Felix, G., & Boller, T.  
679 (2007). A flagellin-induced complex of the receptor FLS2 and BAK1 initiates plant defence.  
680 *Nature*, *448*(7152), 497-500. <https://doi.org/10.1038/nature05999>
- 681 Cho, S. K., Larue, C. T., Chevalier, D., Wang, H., Jinn, T. L., & Zhang, S. (2008). Regulation of floral organ  
682 abscission in Arabidopsis thaliana. *Proc Natl Acad Sci USA*, *105*.  
683 <https://doi.org/10.1073/pnas.0805539105>
- 684 Clough, S. J., & Bent, A. F. (1998). Floral dip: a simplified method for Agrobacterium-mediated  
685 transformation of Arabidopsis thaliana. *The Plant Journal*, *16*(6), 735-743.
- 686 Crick, J., Corrigan, L., Belcram, K., Khan, M., Dawson, J. W., Adroher, B., Li, S., Hepworth, S. R., & Pautot,  
687 V. (2022). Floral organ abscission in Arabidopsis requires the combined activities of three TALE  
688 homeodomain transcription factors. *J Exp Bot*, *73*(18), 6150-6169.  
689 <https://doi.org/10.1093/jxb/erac255>
- 690 Dubiella, U., Seybold, H., Durian, G., Komander, E., Lassig, R., Witte, C. P., Schulze, W. X., & Romeis, T.  
691 (2013). Calcium-dependent protein kinase/NADPH oxidase activation circuit is required for  
692 rapid defense signal propagation. *Proc Natl Acad Sci U S A*, *110*(21), 8744-8749.  
693 <https://doi.org/10.1073/pnas.1221294110>

- 694 Dünser, K., Gupta, S., Herger, A., Feraru, M. I., Ringli, C., & Kleine-Vehn, J. (2019). Extracellular matrix  
695 sensing by FERONIA and Leucine-Rich Repeat Extensins controls vacuolar expansion during  
696 cellular elongation in *Arabidopsis thaliana*. *The EMBO journal*, *38*(7), e100353.  
697 <https://doi.org/10.15252/embj.2018100353>
- 698 Earley, K. W., Haag, J. R., Pontes, O., Opper, K., Juehne, T., Song, K., & Pikaard, C. S. (2006). Gateway-  
699 compatible vectors for plant functional genomics and proteomics. *Plant J*, *45*(4), 616-629.  
700 <https://doi.org/10.1111/j.1365-313X.2005.02617.x>
- 701 Felix, G., Duran, J. D., Volko, S., & Boller, T. (1999). Plants have a sensitive perception system for the  
702 most conserved domain of bacterial flagellin. *The Plant Journal*, *18*(3), 265-276.  
703 [https://onlinelibrary.wiley.com/doi/full/10.1046/j.1365-  
704 313X.1999.00265.x?sid=nlm%3Apubmed](https://onlinelibrary.wiley.com/doi/full/10.1046/j.1365-313X.1999.00265.x?sid=nlm%3Apubmed)
- 705 Feng, W., Kita, D., Peaucelle, A., Cartwright, H. N., Doan, V., Duan, Q., Liu, M. C., Maman, J., Steinhorst,  
706 L., Schmitz-Thom, I., Yvon, R., Kudla, J., Wu, H. M., Cheung, A. Y., & Dinneny, J. R. (2018). The  
707 FERONIA Receptor Kinase Maintains Cell-Wall Integrity during Salt Stress through Ca(2+)  
708 Signaling. *Curr Biol*, *28*(5), 666-675.e665. <https://doi.org/10.1016/j.cub.2018.01.023>
- 709 Frerigmann, H., Pislewska-Bednarek, M., Sanchez-Vallet, A., Molina, A., Glawischnig, E., Gigolashvili, T.,  
710 & Bednarek, P. (2016). Regulation of Pathogen-Triggered Tryptophan Metabolism in  
711 *Arabidopsis thaliana* by MYB Transcription Factors and Indole Glucosinolate Conversion  
712 Products. *Mol Plant*, *9*(5), 682-695. <https://doi.org/10.1016/j.molp.2016.01.006>
- 713 Geiger, D., Scherzer, S., Mumm, P., Marten, I., Ache, P., Matschi, S., Liese, A., Wellmann, C., Al-Rasheid,  
714 K., & Grill, E. (2010). Guard cell anion channel SLAC1 is regulated by CDPK protein kinases with  
715 distinct Ca<sup>2+</sup> affinities. *Proceedings of the National Academy of Sciences*, *107*(17), 8023-8028.
- 716 Gómez-Gómez, L., Felix, G., & Boller, T. (1999). A single locus determines sensitivity to bacterial flagellin  
717 in *Arabidopsis thaliana*. *Plant J*, *18*(3), 277-284. [https://doi.org/10.1046/j.1365-  
718 313x.1999.00451.x](https://doi.org/10.1046/j.1365-313x.1999.00451.x)
- 719 Grini, P. E., Thorstensen, T., Alm, V., Vizcay-Barrena, G., Windju, S. S., Jorstad, T. S., Wilson, Z. A., &  
720 Aalen, R. B. (2009). The ASH1 HOMOLOG 2 (ASHH2) histone H3 methyltransferase is required  
721 for ovule and anther development in *Arabidopsis*. *PLoS One*, *4*(11), e7817.  
722 <https://doi.org/10.1371/journal.pone.0007817>
- 723 Gronnier, J., Franck, C. M., Stegmann, M., DeFalco, T. A., Abarca, A., von Arx, M., Dünser, K., Lin, W.,  
724 Yang, Z., Kleine-Vehn, J., Ringli, C., & Zipfel, C. (2022). Regulation of immune receptor kinase  
725 plasma membrane nanoscale organization by a plant peptide hormone and its receptors. *Elife*,  
726 *11*. <https://doi.org/10.7554/eLife.74162>
- 727 He, P., Shan, L., Lin, N. C., Martin, G. B., Kemmerling, B., Nurnberger, T., & Sheen, J. (2006). Specific  
728 bacterial suppressors of MAMP signaling upstream of MAPKKK in *Arabidopsis* innate immunity.  
729 *Cell*, *125*(3), 563-575. <https://doi.org/10.1016/j.cell.2006.02.047>
- 730 Hou, S., Wang, X., Chen, D., Yang, X., Wang, M., Turrà, D., Di Pietro, A., and Zhang, W. (2014). The  
731 secreted peptide PIP1 amplifies immunity through Receptor-Like Kinase 7. *PLoS Pathog* *10*:  
732 e1004331.
- 733 Huffaker, A., Pearce, G., & Ryan, C. A. (2006). An endogenous peptide signal in *Arabidopsis* activates  
734 components of the innate immune response. *Proc Natl Acad Sci U S A*, *103*(26), 10098-10103.  
735 <https://doi.org/10.1073/pnas.0603727103>
- 736 Kadota, Y., Shirasu, K., & Zipfel, C. (2015). Regulation of the NADPH Oxidase RBOHD During Plant  
737 Immunity. *Plant and Cell Physiology*, *56*(8), 1472-1480. <https://doi.org/10.1093/pcp/pcv063>
- 738 Kadota, Y., Sklenar, J., Derbyshire, P., Stransfeld, L., Asai, S., Ntoukakis, V., Jones, J. D., Shirasu, K.,  
739 Menke, F., Jones, A., & Zipfel, C. (2014). Direct regulation of the NADPH oxidase RBOHD by the  
740 PRR-associated kinase BIK1 during plant immunity. *Mol Cell*, *54*(1), 43-55.  
741 <https://doi.org/10.1016/j.molcel.2014.02.021>
- 742 Keinath, N. F., Waadt, R., Brugman, R., Schroeder, J. I., Grossmann, G., Schumacher, K., & Krebs, M.  
743 (2015). Live Cell Imaging with R-GECO1 Sheds Light on flg22- and Chitin-Induced Transient

- 744 [Ca<sup>2+</sup>]<sub>cyt</sub> Patterns in Arabidopsis. *Mol Plant*, 8(8), 1188-1200.  
745 <https://doi.org/10.1016/j.molp.2015.05.006>
- 746 Kissoudis, C., Sunarti, S., van de Wiel, C., Visser, R. G., van der Linden, C. G., & Bai, Y. (2016). Responses  
747 to combined abiotic and biotic stress in tomato are governed by stress intensity and resistance  
748 mechanism. *J Exp Bot*, 67(17), 5119-5132. <https://doi.org/10.1093/jxb/erw285>
- 749 Knight, H., Trewavas, A. J., & Knight, M. R. (1997). Calcium signalling in Arabidopsis thaliana responding  
750 to drought and salinity. *Plant J*, 12(5), 1067-1078. <https://doi.org/10.1046/j.1365-313x.1997.12051067.x>
- 751 Knight, M. R., Campbell, A. K., Smith, S. M., & Trewavas, A. J. (1991). Transgenic plant aequorin reports  
752 the effects of touch and cold-shock and elicitors on cytoplasmic calcium. *Nature*, 352(6335),  
753 524-526. <https://doi.org/10.1038/352524a0>
- 754 Krebs, M., & Schumacher, K. (2013). Live cell imaging of cytoplasmic and nuclear Ca<sup>2+</sup> dynamics in  
755 Arabidopsis roots. *Cold Spring Harbor Protocols*, 2013(8), pdb. prot073031.
- 756 Kudla, J., Becker, D., Grill, E., Hedrich, R., Hippler, M., Kummer, U., Parniske, M., Romeis, T., &  
757 Schumacher, K. (2018). Advances and current challenges in calcium signaling. *New Phytol*,  
758 218(2), 414-431. <https://doi.org/10.1111/nph.14966>
- 759 Kumpf, R. P., Shi, C. L., Larrieu, A., Sto, I. M., Butenko, M. A., Peret, B., Riiser, E. S., Bennett, M. J., &  
760 Aalen, R. B. (2013). Floral organ abscission peptide IDA and its HAE/HSL2 receptors control cell  
761 separation during lateral root emergence. *Proc Natl Acad Sci U S A*, 110(13), 5235-5240.  
762 <https://doi.org/10.1073/pnas.1210835110>
- 763 Kärkönen, A., & Kuchitsu, K. (2015). Reactive oxygen species in cell wall metabolism and development  
764 in plants. *Phytochemistry*, 112, 22-32.  
765 <https://doi.org/https://doi.org/10.1016/j.phytochem.2014.09.016>
- 766 Ladwig, F., Dahlke, R. I., Stührwohldt, N., Hartmann, J., Harter, K., & Sauter, M. (2015). Phytosulfokine  
767 Regulates Growth in Arabidopsis through a Response Module at the Plasma Membrane That  
768 Includes CYCLIC NUCLEOTIDE-GATED CHANNEL17, H<sup>+</sup>-ATPase, and BAK1. *Plant Cell*, 27(6),  
769 1718-1729. <https://doi.org/10.1105/tpc.15.00306>
- 770 Lee, Y., Yoon, T. H., Lee, J., Jeon, S. Y., Lee, J. H., Lee, M. K., Chen, H., Yun, J., Oh, S. Y., Wen, X., Cho, H.  
771 K., Mang, H., & Kwak, J. M. (2018). A Lignin Molecular Brace Controls Precision Processing of  
772 Cell Walls Critical for Surface Integrity in Arabidopsis. *Cell*, 173(6), 1468-1480.e1469.  
773 <https://doi.org/10.1016/j.cell.2018.03.060>
- 774 Li, L., Li, M., Yu, L., Zhou, Z., Liang, X., Liu, Z., Cai, G., Gao, L., Zhang, X., Wang, Y., Chen, S., & Zhou, J.  
775 M. (2014). The FLS2-associated kinase BIK1 directly phosphorylates the NADPH oxidase RbohD  
776 to control plant immunity. *Cell Host Microbe*, 15(3), 329-338.  
777 <https://doi.org/10.1016/j.chom.2014.02.009>
- 778 Luna, E., Pastor, V., Robert, J., Flors, V., Mauch-Mani, B., & Ton, J. (2011). Callose deposition: a  
779 multifaceted plant defense response. *Mol Plant Microbe Interact*, 24(2), 183-193.  
780 <https://doi.org/10.1094/mpmi-07-10-0149>
- 781 Ma, Y., Walker, R. K., Zhao, Y., & Berkowitz, G. A. (2012). Linking ligand perception by PEPR pattern  
782 recognition receptors to cytosolic Ca<sup>2+</sup> elevation and downstream immune signaling in plants.  
783 *Proc Natl Acad Sci U S A*, 109(48), 19852-19857. <https://doi.org/10.1073/pnas.1205448109>
- 784 Matsubayashi, Y. (2011). Post-translational modifications in secreted peptide hormones in plants.  
785 *Plant Cell Physiol*, 52(1), 5-13. <https://doi.org/10.1093/pcp/pcq169>
- 786 McKenna, J. F., Rolfe, D. J., Webb, S. E. D., Tolmie, A. F., Botchway, S. W., Martin-Fernandez, M. L.,  
787 Hawes, C., & Runions, J. (2019). The cell wall regulates dynamics and size of plasma-membrane  
788 nanodomains in Arabidopsis. *Proc Natl Acad Sci U S A*, 116(26), 12857-12862.  
789 <https://doi.org/10.1073/pnas.1819077116>
- 790 Meng, X., Zhou, J., Tang, J., Li, B., de Oliveira, M. V., Chai, J., He, P., & Shan, L. (2016). Ligand-Induced  
791 Receptor-like Kinase Complex Regulates Floral Organ Abscission in Arabidopsis. *Cell Rep*, 14(6),  
792 1330-1338. <https://doi.org/10.1016/j.celrep.2016.01.023>
- 793

- 794 Meng, X., Zhou, J., Tang, J., Li, B., de Oliveira, M. V. V., Chai, J., He, P., & Shan, L. (2016). Ligand-Induced  
795 Receptor-like Kinase Complex Regulates Floral Organ Abscission in Arabidopsis. *Cell reports*,  
796 *14*(6), 1330-1338. <https://doi.org/10.1016/j.celrep.2016.01.023>
- 797 Monshausen, G. B., Messerli, M. A., & Gilroy, S. (2008). Imaging of the Yellow Cameleon 3.6 indicator  
798 reveals that elevations in cytosolic Ca<sup>2+</sup> follow oscillating increases in growth in root hairs of  
799 Arabidopsis. *Plant Physiol*, *147*(4), 1690-1698. <https://doi.org/10.1104/pp.108.123638>
- 800 Niederhuth, C., Patharkar, O. R., & Walker, J. (2013). Transcriptional profiling of the Arabidopsis  
801 abscission mutant *hae hsl2* by RNA-Seq. *BMC Genomics*, *14*(1), 37.  
802 <http://www.biomedcentral.com/1471-2164/14/37>
- 803 Olsson, V., Joos, L., Zhu, S., Gevaert, K., Butenko, M. A., & De Smet, I. (2018). Look Closely, the Beautiful  
804 May Be Small: Precursor-Derived Peptides in Plants. *Annu Rev Plant Biol*.  
805 <https://doi.org/10.1146/annurev-arplant-042817-040413>
- 806 Patharkar, O. R., Gassmann, W., & Walker, J. C. (2017). Leaf shedding as an anti-bacterial defense in  
807 Arabidopsis cauline leaves. *PLoS Genet*, *13*(12), e1007132.  
808 <https://doi.org/10.1371/journal.pgen.1007132>
- 809 Patharkar, O. R., & Walker, J. C. (2015). Floral organ abscission is regulated by a positive feedback loop.  
810 *Proc Natl Acad Sci U S A*, *112*(9), 2906-2911. <https://doi.org/10.1073/pnas.1423595112>
- 811 Patharkar, O. R., & Walker, J. C. (2016). Core Mechanisms Regulating Developmentally Timed and  
812 Environmentally Triggered Abscission. *Plant Physiol*, *172*(1), 510-520.  
813 <https://doi.org/10.1104/pp.16.01004>
- 814 Poncini, L., Wyrsh, I., Déneraud Tendon, V., Vorley, T., Boller, T., Geldner, N., Métraux, J. P., &  
815 Lehmann, S. (2017). In roots of Arabidopsis thaliana, the damage-associated molecular pattern  
816 AtPep1 is a stronger elicitor of immune signalling than flg22 or the chitin heptamer. *PLoS One*,  
817 *12*(10), e0185808. <https://doi.org/10.1371/journal.pone.0185808>
- 818 Qi, Z., Verma, R., Gehring, C., Yamaguchi, Y., Zhao, Y., Ryan, C. A., & Berkowitz, G. A. (2010). Ca<sup>2+</sup>  
819 signaling by plant Arabidopsis thaliana Pep peptides depends on AtPepR1, a receptor with  
820 guanylyl cyclase activity, and cGMP-activated Ca<sup>2+</sup> channels. *Proc Natl Acad Sci U S A*, *107*(49),  
821 21193-21198. <https://doi.org/10.1073/pnas.1000191107>
- 822 Ranf, S., Eschen-Lippold, L., Pecher, P., Lee, J., & Scheel, D. (2011). Interplay between calcium signalling  
823 and early signalling elements during defence responses to microbe- or damage-associated  
824 molecular patterns. *Plant J*, *68*(1), 100-113. <https://doi.org/10.1111/j.1365-313X.2011.04671.x>
- 826 Ranf, S., Grimmer, J., Poschl, Y., Pecher, P., Chinchilla, D., Scheel, D., & Lee, J. (2012). Defense-related  
827 calcium signaling mutants uncovered via a quantitative high-throughput screen in Arabidopsis  
828 thaliana. *Mol Plant*, *5*(1), 115-130. <https://doi.org/10.1093/mp/ssr064>
- 829 Robatzek, S., Chinchilla, D., & Boller, T. (2006). Ligand-induced endocytosis of the pattern recognition  
830 receptor FLS2 in Arabidopsis. *Genes Dev*, *20*(5), 537-542. <https://doi.org/10.1101/gad.366506>
- 831 Roberts, J. A., Whitelaw, C. A., Gonzalez-Carranza, Z. H., & McManus, M. T. (2000). Cell Separation  
832 Processes in Plants- Models, Mechanisms and Manipulation. *Annals of Botany*, *86*, 223-235.
- 833 Roman, A. O., Jimenez-Sandoval, P., Augustin, S., Broyart, C., Hothorn, L. A., & Santiago, J. (2022). HSL1  
834 and BAM1/2 impact epidermal cell development by sensing distinct signaling peptides. *Nat*  
835 *Commun*, *13*(1), 876. <https://doi.org/10.1038/s41467-022-28558-4>
- 836 Rzemieniewski, J., Leicher, H., Lee, H. K., Broyart, C., Nayem, S., Wiese, C., Maroschek, J., Camgöz, Z.,  
837 Lalun, V. O., Djordjevic, M. A., Vlot, A. C., Hüchelhoven, R., Santiago, J., & Stegmann, M. (2022).  
838 Phytocytokine signaling integrates cell surface immunity and nitrogen limitation. *bioRxiv*,  
839 2022.2012.2020.521212. <https://doi.org/10.1101/2022.12.20.521212>
- 840 Sanders, D., Brownlee, C., & Harper, J. F. (1999). Communicating with calcium. *Plant Cell*, *11*(4), 691-  
841 706. <https://doi.org/10.1105/tpc.11.4.691>



- 842 Santiago, J., Brandt, B., Wildhagen, M., Hohmann, U., Hothorn, L. A., & Butenko, M. A. (2016).  
843 Mechanistic insight into a peptide hormone signaling complex mediating floral organ  
844 abscission. *Elife.*, 5. <https://doi.org/10.7554/eLife.15075>
- 845 Scherzer, S., Maierhofer, T., Al-Rasheid, K. A. S., Geiger, D., & Hedrich, R. (2012). Multiple calcium-  
846 dependent kinases modulate ABA-activated guard cell anion channels. *Mol Plant*, 5(6), 1409-  
847 1412. <https://doi.org/10.1093/mp/sss084>
- 848 Schindelin, J., Arganda-Carreras, I., Frise, E., Kaynig, V., Longair, M., Pietzsch, T., Preibisch, S., Rueden,  
849 C., Saalfeld, S., Schmid, B., Tinevez, J.-Y., White, D. J., Hartenstein, V., Eliceiri, K., Tomancak, P.,  
850 & Cardona, A. (2012). Fiji: an open-source platform for biological-image analysis. *Nat Methods*,  
851 9(7), 676-682. <https://doi.org/10.1038/nmeth.2019>
- 852 Shi, C.-L., von Wangenheim, D., Herrmann, U., Wildhagen, M., Kulik, I., Kopf, A., Ishida, T., Olsson, V.,  
853 Anker, M. K., Albert, M., Butenko, M. A., Felix, G., Sawa, S., Claassen, M., Friml, J., & Aalen, R.  
854 B. (2018). The dynamics of root cap sloughing in Arabidopsis is regulated by peptide signalling.  
855 *Nat Plants*, 4(8), 596-604. <https://doi.org/10.1038/s41477-018-0212-z>
- 856 Smakowska-Luzan, E., Mott, G. A., Parys, K., Stegmann, M., Howton, T. C., Layeghifard, M., Neuhold,  
857 J., Lehner, A., Kong, J., Grunwald, K., Weinberger, N., Satbhai, S. B., Mayer, D., Busch, W.,  
858 Madalinski, M., Stolt-Bergner, P., Provart, N. J., Mukhtar, M. S., Zipfel, C., . . . Belkhadir, Y.  
859 (2018). An extracellular network of Arabidopsis leucine-rich repeat receptor kinases. *Nature*,  
860 553(7688), 342-346. <https://doi.org/10.1038/nature25184>
- 861 Somssich, M., Bleckmann, A., & Simon, R. (2016). Shared and distinct functions of the pseudokinase  
862 CORYNE (CRN) in shoot and root stem cell maintenance of Arabidopsis. *J Exp Bot*, 67(16), 4901-  
863 4915. <https://doi.org/10.1093/jxb/erw207>
- 864 Steinhorst, L., & Kudla, J. (2013). Calcium and reactive oxygen species rule the waves of signaling. *Plant*  
865 *Physiol*, 163(2), 471-485. <https://doi.org/10.1104/pp.113.222950>
- 866 Stenvik, G. E., Tandstad, N. M., Guo, Y., Shi, C. L., Kristiansen, W., & Holmgren, A. (2008). The EPIP  
867 peptide of INFLORESCENCE DEFICIENT IN ABSCISSION is sufficient to induce abscission in  
868 Arabidopsis through the receptor-like kinases HAESA and HAESA-LIKE2. *Plant Cell.*, 20.  
869 <https://doi.org/10.1105/tpc.108.059139>
- 870 Sto, I. M., Orr, R. J., Fooyontphanich, K., Jin, X., Knutsen, J. M., Fischer, U., Tranbarger, T. J., Nordal, I.,  
871 & Aalen, R. B. (2015). Conservation of the abscission signaling peptide IDA during Angiosperm  
872 evolution: withstanding genome duplications and gain and loss of the receptors HAE/HSL2.  
873 *Front Plant Sci*, 6, 931. <https://doi.org/10.3389/fpls.2015.00931>
- 874 Taylor, I., & Walker, J. C. (2018). Transcriptomic evidence for distinct mechanisms underlying abscission  
875 deficiency in the Arabidopsis mutants haesa/haesa-like 2 and nevershed. *BMC Res Notes*,  
876 11(1), 754. <https://doi.org/10.1186/s13104-018-3864-x>
- 877 Torres, M. A., & Dangl, J. L. (2005). Functions of the respiratory burst oxidase in biotic interactions,  
878 abiotic stress and development. *Curr Opin Plant Biol*, 8(4), 397-403.  
879 <https://doi.org/10.1016/j.pbi.2005.05.014>
- 880 Vie, A. K., Najafi, J., Liu, B., Winge, P., Butenko, M. A., Hornslien, K. S., Kumpf, R., Aalen, R. B., Bones,  
881 A. M., & Brembu, T. (2015). The IDA/IDA-LIKE and PIP/PIP-LIKE gene families in Arabidopsis:  
882 phylogenetic relationship, expression patterns, and transcriptional effect of the PIPL3 peptide.  
883 *Journal of Experimental Botany*, 66(17), 5351-5365. <https://doi.org/10.1093/jxb/erv285>
- 884 Wang, Y., Li, X., Fan, B., Zhu, C., & Chen, Z. (2021). Regulation and Function of Defense-Related Callose  
885 Deposition in Plants. *Int J Mol Sci*, 22(5). <https://doi.org/10.3390/ijms22052393>

886

887

888 Main figures - A dual function of the IDA peptide in regulating cell  
 889 separation and modulating plant immunity at the molecular level

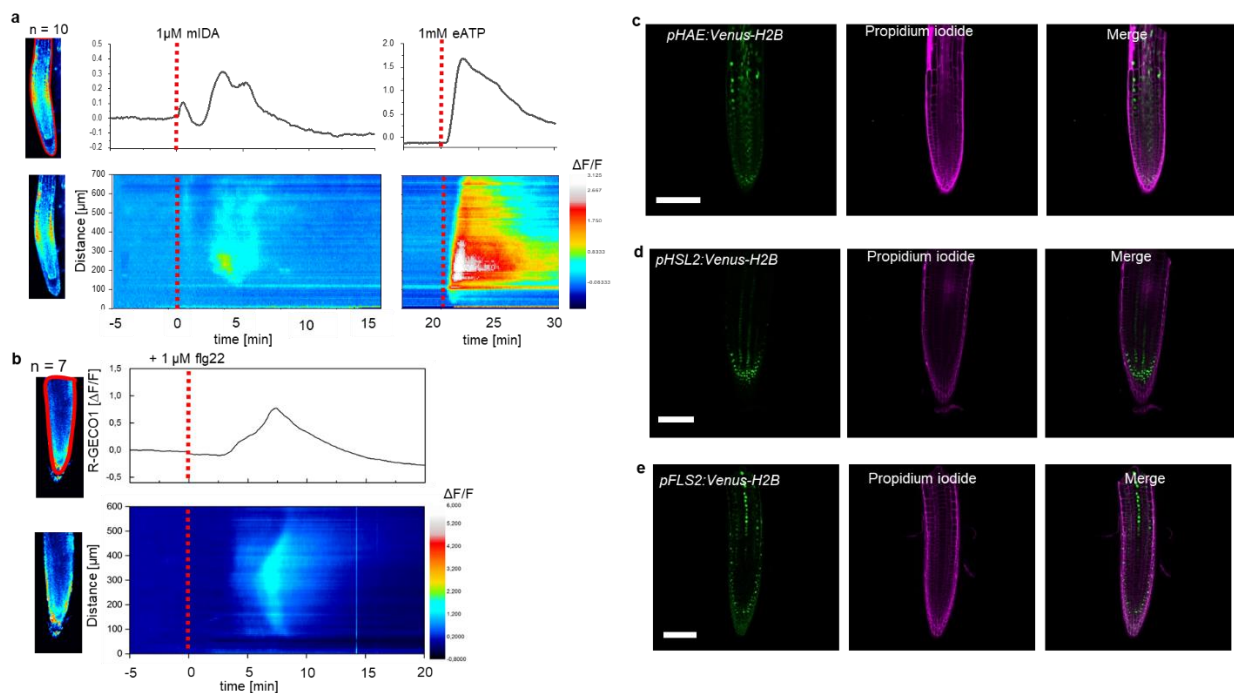

890

891

892 Fig. 1: mIDA-induced  $[\text{Ca}^{2+}]_{\text{cyt}}$  release in Arabidopsis roots correlates with *pHAE* and *pHSL2* activity

893 a, Normalized R-GECO1 fluorescence intensities ( $\Delta F/F$ ) were measured from regions of interest (ROI)  
 894 (upper panel, outlined in red) in the meristematic and elongation zone of the root. Fluorescence  
 895 intensities ( $\Delta F/F$ ) over time of the whole root represented in a heat map (lower panel). Shown are  
 896 cytosolic calcium concentration ( $[\text{Ca}^{2+}]_{\text{cyt}}$ ) dynamics in the ROI in response to 1  $\mu\text{M}$  mIDA over time. (see  
 897 also Movie 1). Red lines at 5 minutes (min) indicates application of mIDA peptide or application of eATP  
 898 at 22 min. Representative response from 10 roots (Sup Fig. 2). The increase in  $[\text{Ca}^{2+}]_{\text{cyt}}$  response  
 899 propagates through the roots as two waves. b, For comparison; Normalized R-GECO1 fluorescence  
 900 intensities ( $\Delta F/F$ ) measured from regions of interest (ROI) (outlined in red, upper panel) in response to  
 901 1  $\mu\text{M}$  flg22 over time. Fluorescence intensities ( $\Delta F/F$ ) over time of the whole root represented in a heat  
 902 map (lower panel). Red line at 0 min (min) indicates application of flg22 peptide. Representative  
 903 response from 7 roots (Sup Fig. 3). The increase in  $[\text{Ca}^{2+}]_{\text{cyt}}$  response propagates through the roots as a  
 904 single wave seen as normalized R-GECO1 fluorescence intensities ( $\Delta F/F$ ) shown as a heat map (see also  
 905 movie 2). c,d,e, Expression of the receptors c, *pHAE:Venus-H2B* d, *pHSL2:Venus-H2B* and e,  
 906 *pFLS2:Venus-H2B* in 7 days-old roots. Representative pictures of n = 8. Scale bar = 50  $\mu\text{m}$ , single plane  
 907 image, magenta = propidium iodide stain.



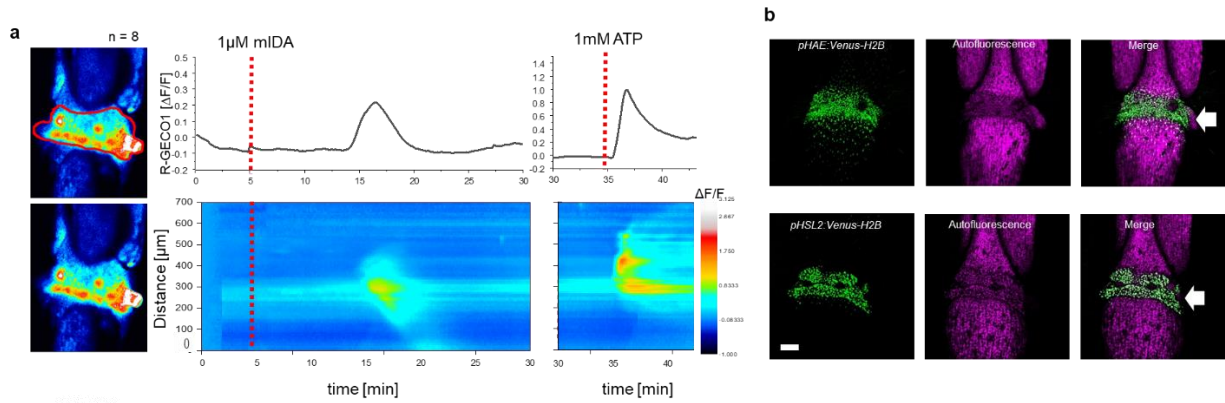

908

909 **Fig. 2 : mIDA-induced  $[Ca^{2+}]_{cyt}$  release in Arabidopsis abscission zones.**

910 **a**, Normalized R-GECO1 fluorescence intensities ( $\Delta F/F$ ) were measured from regions of interest (ROI)  
911 (outlined in red) in floral abscission zone (AZ)s. Shown are cytosolic calcium concentration ( $[Ca^{2+}]_{cyt}$ )  
912 dynamics in the ROI in response to 1  $\mu$ M mIDA over time (see also Movie 3). Representative response  
913 from 8 flowers (Sup. Fig 6). Red lines at 5 minutes (min) indicates application of mIDA peptide or  
914 application of eATP at 35 min (for AZs), respectively. The increase in  $[Ca^{2+}]_{cyt}$  response propagates  
915 through the AZ as a single wave. **b**, Expression of *pHA::Venus-H2B* and *pHSL2::Venus-H2B* in flowers at  
916 position 6 (See Sup Fig. 5a for positions) (arrowhead indicates AZ). Representative pictures of  $n = 8$ ,  
917 scale bar = 100  $\mu$ m, maximum intensity projections of z-stacks.

918

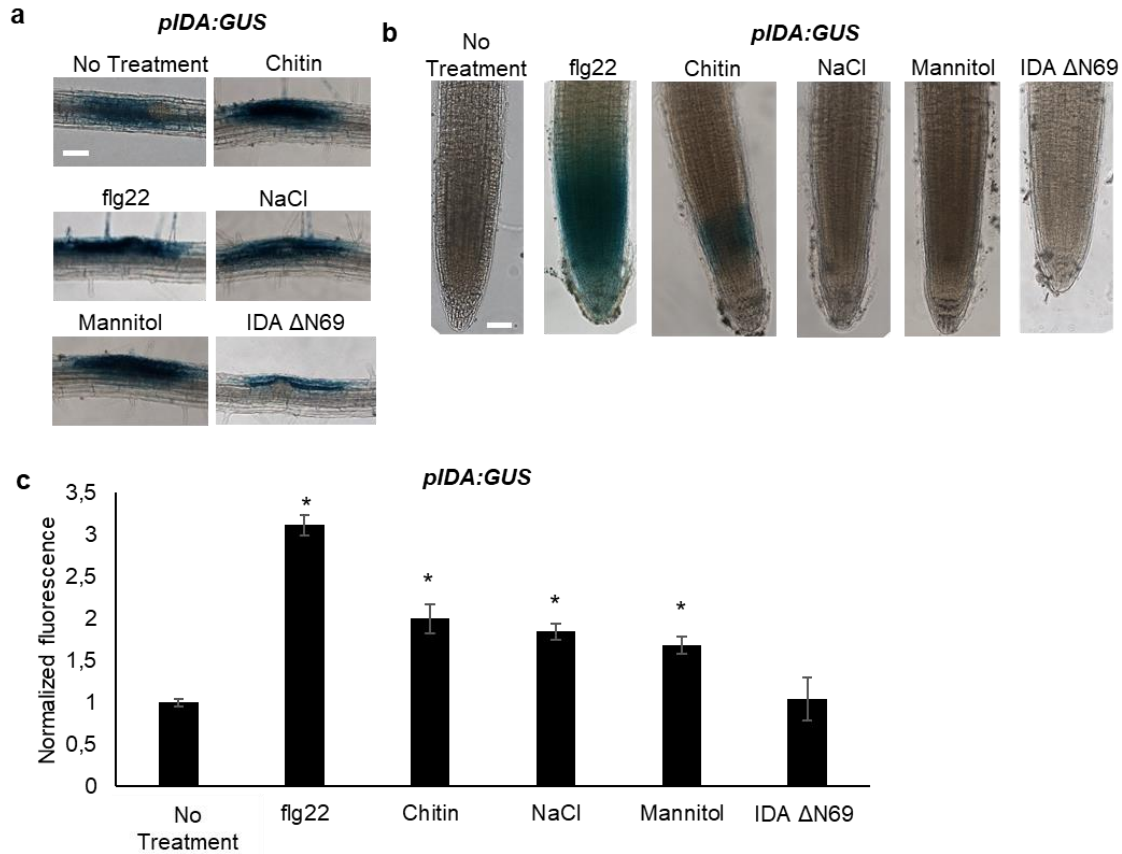

919

920 **Fig. 3: IDA is induced by biotic and abiotic stress**

921 Representative pictures of *pIDA:GUS* expression after 12 h treatment with 1  $\mu$ M flg22, chitin, NaCl,  
922 Mannitol and 1  $\mu$ M IDA $\Delta$ N69 in **a**, cells surrounding emerging lateral roots, and **b**, in the main root. **c**,  
923 Normalized emitted fluorescence of fluorochrome 4-methyl umbelliferone (4-MU) in 7 days-old  
924 seedlings after 12 h treatment with 1  $\mu$ M flg22, chitin, NaCl, Mannitol and 1  $\mu$ M of the inactive IDA  
925 peptide, IDA $\Delta$ N69. Normalized to 1 on No Treatment sample. Controls were not subjected to any stimuli  
926 (No treatment). n = 6, experiment repeated 3 times. \* = significantly different from the non-treated (No  
927 treatment) sample ( $p < 0.05$ , student t-test, two tailed). Controls were not subjected to any stimuli (No  
928 treatment). **a,b**, Representative picture of n = 10, experiment repeated 3 times, scale bar = 50  $\mu$ m.

929

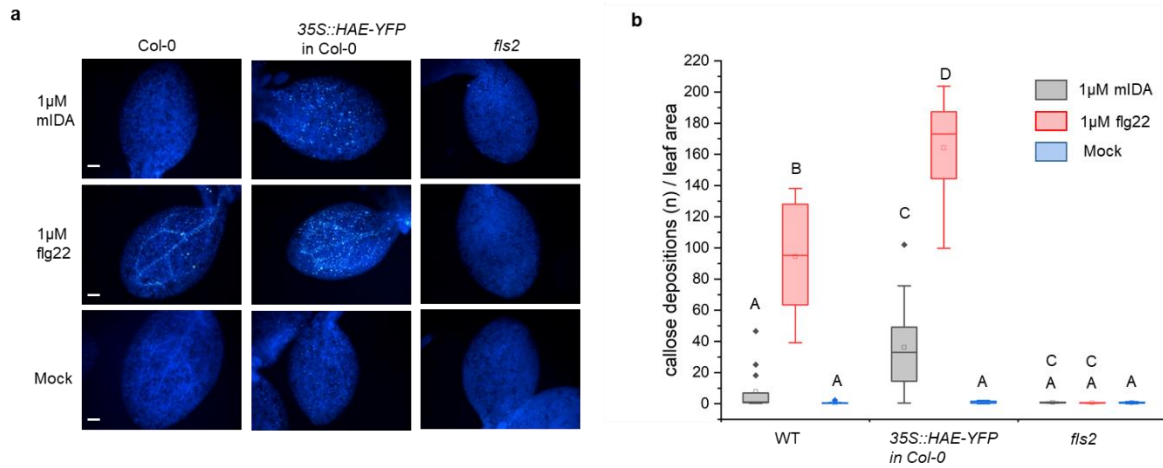

930

931 **Fig. 4: mIDA induce callose deposition in Arabidopsis cotyledons expressing 35S::HAE-YFP**

932 Callose deposition in Col-0 WT, 35S:HAE in Col-0 and *fls2* treated with water (mock treatment), 1 μM  
933 mIDA or 1 μM flg22. **a**, Callose deposition could be observed in cotyledons of eight day old Col-0 WT and  
934 35S:HAE in seedlings treated with 1 μM flg22, and to a smaller extend in 35S:HAE treated with 1 μM  
935 mIDA. No callose deposition could be detected in the *fls2* mutant. Representative images of 9-12  
936 seedlings per genotype. Scale bar 500 μm. **b**, Total callose depositions for the different genotypes  
937 treated with water (mock treatment), 1 μM mIDA or 1 μM flg22. Statistically significant difference at (p  
938 < 0,05). N = 9-12

939

940

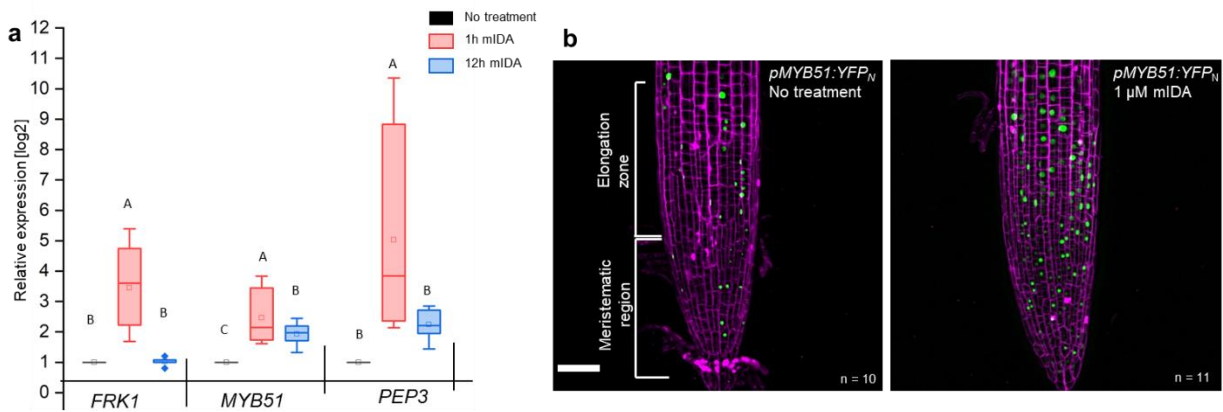

941

942 **Fig. 5: mIDA induced transcription of defense-associated marker genes**

943 **a**, Transcripts of *FRK1*, *MYB51*, and *PEP3* in WT Col-0 seedlings exposed to 1  $\mu$ M mIDA for 1 h (red) and  
944 to 1  $\mu$ M mIDA for 12 h (blue) compared to untreated tissue (black). RNA levels were measured by RT-  
945 qPCR analysis. *ACTIN* was used to normalize mRNA levels. Figure represents three biological replicates  
946 with four technical replicates. Statistical analysis was performed comparing induction times of  
947 individual genes using one-way ANOVA and post-hoc Tukey's test ( $p < 0.05$ ). **b**, *pMYB51:YFP<sub>N</sub>* expression  
948 is enhanced in roots after 7 h exposure to 1  $\mu$ M mIDA peptide compared to untreated roots (control),  
949 scale bar = 50  $\mu$ m, maximum intensity projections of z-stacks, magenta = propidium iodide stain.

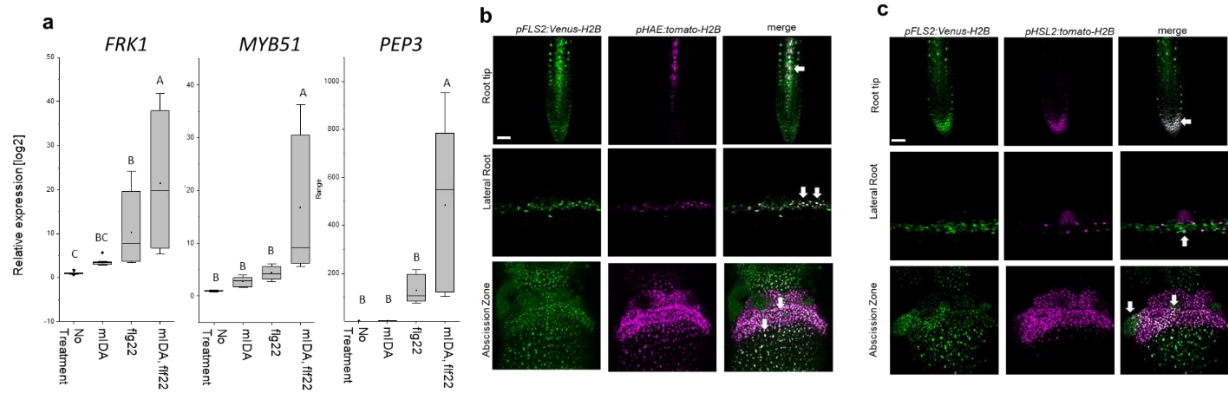

950

951 **Fig. 6: mIDA and flg22 co-treatment extremely enhances the transcription of defense-associated marker**  
 952 **genes**

953 **a**, RT-qPCR data showing transcription of *FRK1*, *MYB51*, and *PEP3* in Col-0 WT seedlings exposed to 1  
 954  $\mu\text{M}$  mIDA, 1  $\mu\text{M}$  flg22 or a combination of 1  $\mu\text{M}$  mIDA and 1  $\mu\text{M}$  flg22 for 1 h compared to untreated  
 955 seedlings (No treatment control). *ACTIN* was used to normalize mRNA levels. Figure represent three  
 956 biological replicates with four technical replicates. Statistical analyses comparing No Treatment to  
 957 peptide treated samples was performed using one-way ANOVA and post-hoc Tukey's test ( $p < 0.05$ ). **b**,  
 958 Microscopic analysis of 7-days-old *pFLS2:Venus-H2B pHAE:Tomato-H2B* expressing plants of root tip  
 959 (upper panel) and lateral root (middle panel) of 7 days old plants, and flowers at position 6 (lower  
 960 panel). Fluorescent nuclei representing co-expression of the Venus and Tomato marker could be  
 961 observed in cells surrounding emerging LR, in the stele of the root, as well as in the abscission zone.  
 962 **c**, Microscopic analysis of 7-days-old *pFLS2:Venus-H2B pHSL2:Tomato-H2B* expressing plants of root  
 963 tip (upper panel) and lateral root (middle panel) of 7 days old plants, and flowers at position 6 (lower  
 964 panel). Fluorescent nuclei representing co-expression of the Venus and Tomato marker could be  
 965 observed in the root tip, in cells surrounding emerging LR, as well as in the abscission zone. Root  
 966 pictures scale bar = 50  $\mu\text{m}$ , single plane image. Abscission zone images= maximum intensity  
 967 projections of z-stacks. Scale = 50 $\mu\text{m}$ .

968

969

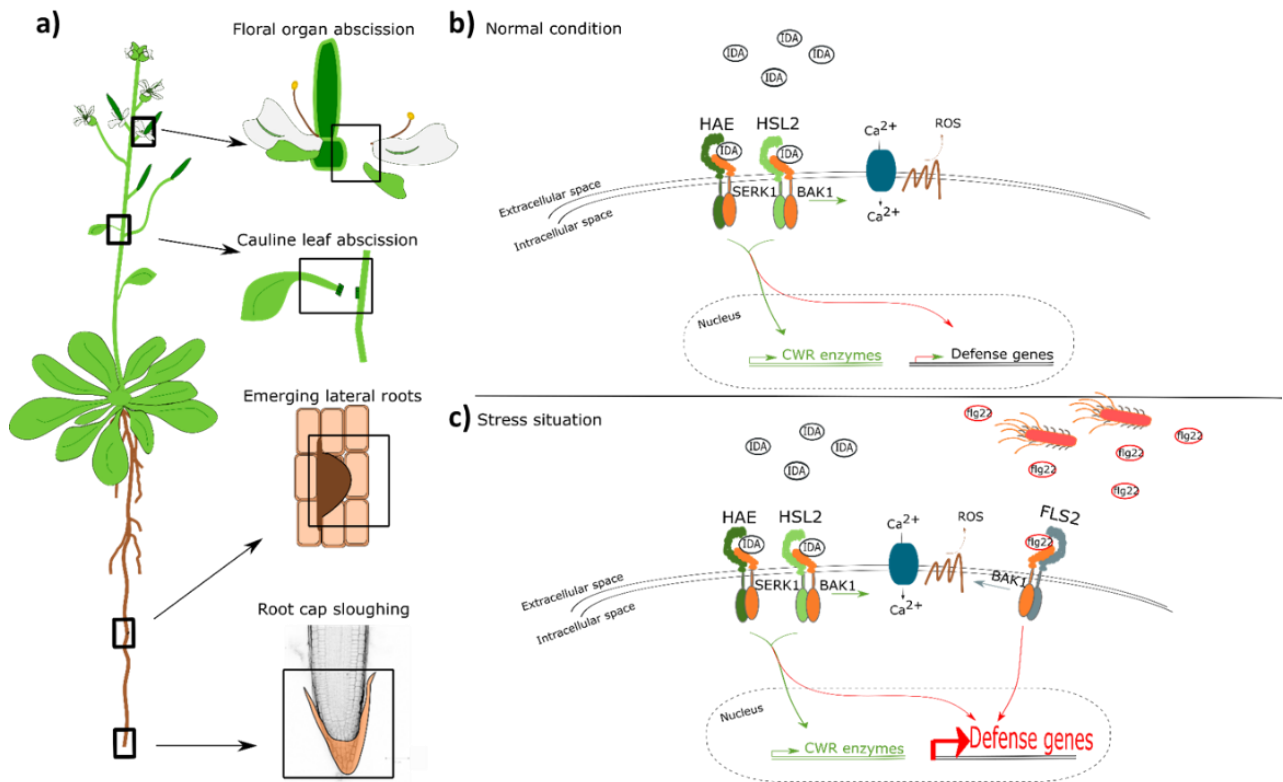

970

971 Fig. 7: IDA regulates cell separation processes, but is also involved in major transcription of defense  
972 genes upon pathogen attack.

973 **a**, IDA and the IDL peptides control cell separation processes during plant development and in response  
974 to abiotic and biotic stress (Butenko et al. 2003; Patharkar and Walker 2016; Patharkar et al. 2017; Shi  
975 et al. 2018). Tissue undergoing cell separation includes floral organ abscission, cauline leaf abscission,  
976 emerging of lateral roots and root cap sloughing. **b**, During normal conditions, IDA control floral organ  
977 abscission and emergence of lateral roots by relaying a signal through receptor complexes including  
978 HAE, HSL2, SERK1 and BAK1 to modulate the expression of cell wall remodeling (CWR) genes as well as  
979 moderately expression of defense genes. IDA activates a receptor dependent production of ROS and an  
980 increase in  $[Ca^{2+}]_{cyt}$ . **b**, Upon stress, such as pathogen attack, the activation of HAE and HSL2 acts in  
981 addition to activation of defense related receptors, such as FLS2, to enhance the expression of defense  
982 related genes significantly. This ensure optimal protection of cells undergoing cell separation, which  
983 may be major entry routes during a pathogen attack.

984

985

986 Supplementary figures - A dual function of the IDA peptide in  
987 regulating cell separation and modulating plant immunity at the  
988 molecular level

989

990

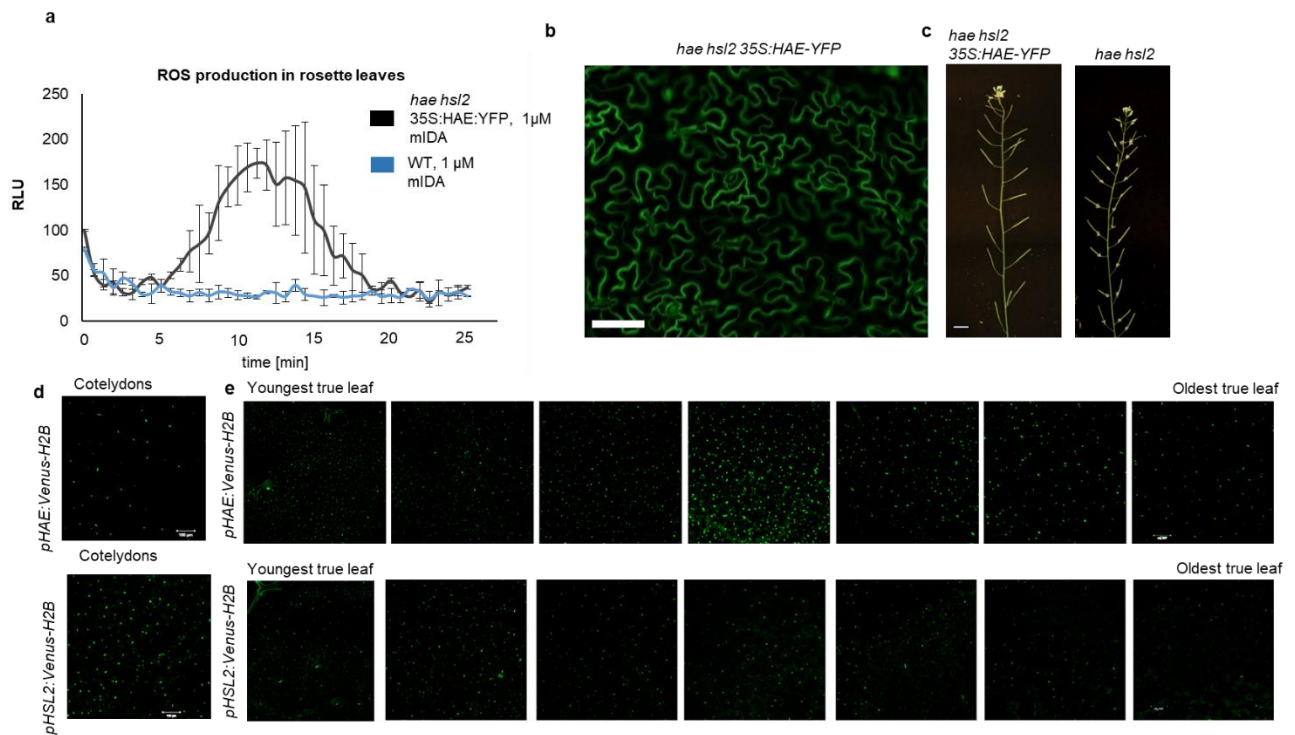

991

992

993 Sup Fig. 1: IDA induces ROS production in Arabidopsis

994 **a**, ROS production detected by the luminol-based assay was monitored over time as RLU. ROS

995 production from *hae hsl2* leaf disks expressing 35S:HAE:YFP in response to 1 μM mIDA (black) and in

996 WT control (blue). **b**, Fluorescent image of *hae hsl2* rosette leaves expressing 35S:HAE:YFP. Signal is

997 detected in the plasma membrane of cells in the epidermal layer. Representative picture. Scale bar =

998 50 μm. **c**, 35S:HAE:YFP complements the *hae hsl2* mutant abscission phenotype of observed. Scale = 1

999 cm. **d,e**, Microscopic analysis of *pHAE:Venus-H2B* (upper panel) and *pHSL2:Venus-H2B* (lower panel)

1000 in **d**, cotyledons of 7 days old seedlings and in **e**, rosette leaves of a 22 days old Arabidopsis plant

1001 containing 7 true leaves. Expression in each leaf is shown from youngest (left) to oldest (right). Scale =

1002 100 μm

1003



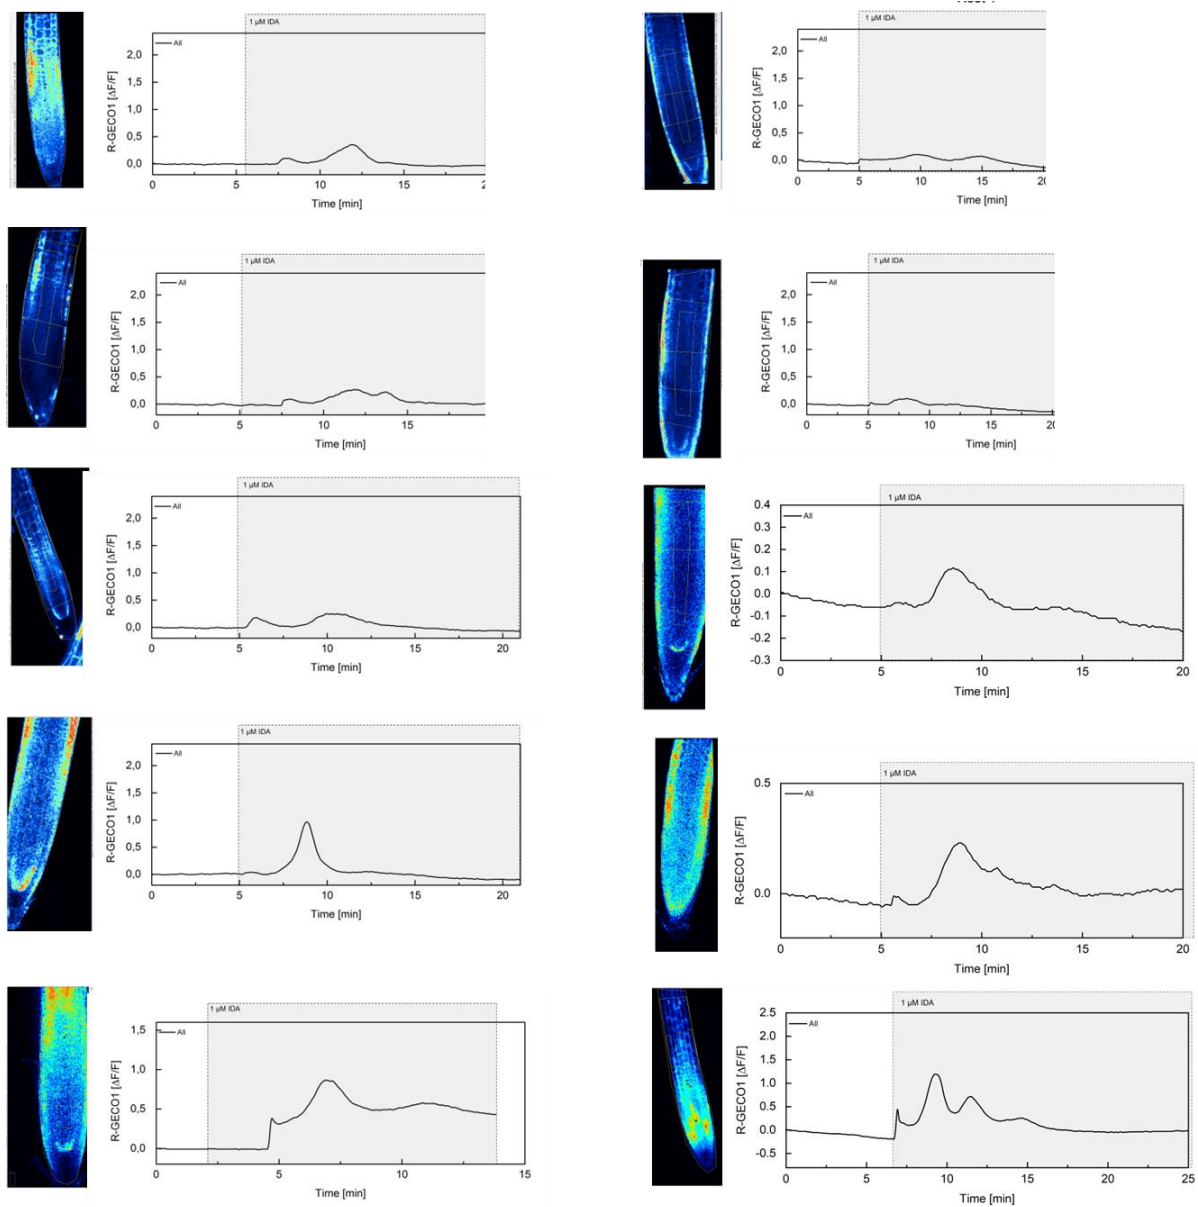

1004

1005 **Sup Fig. 2: mIDA-induced  $[Ca^{2+}]_{cyt}$  release in Arabidopsis roots**

1006 Shown are cytosolic calcium concentration ( $[Ca^{2+}]_{cyt}$ ) dynamics in the ROI in response to 1  $\mu$ M mIDA  
1007 over time. Normalized R-GECO1 fluorescence intensities ( $\Delta F/F$ ) were measured from a region of  
1008 interest (ROI) containing the meristematic and elongation zone of the root.

1009

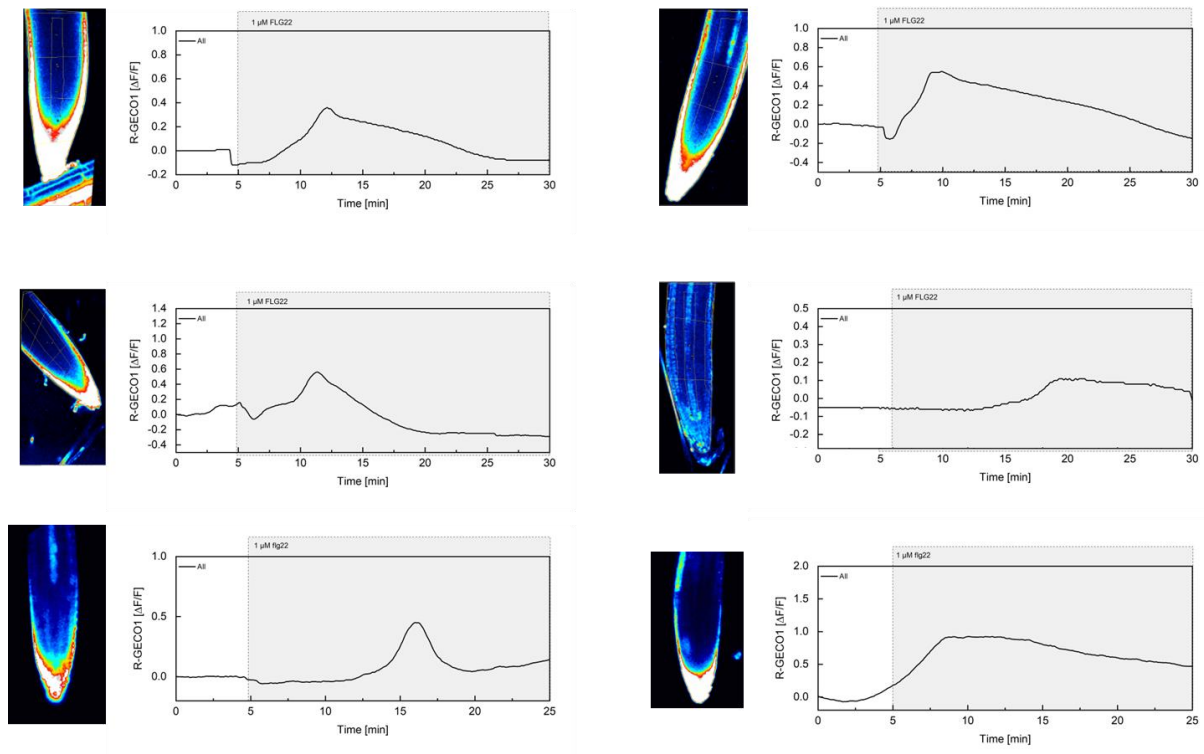

1010

1011 **Sup Fig. 3: flg22-induced  $[Ca^{2+}]_{cyt}$  release in Arabidopsis roots**

1012 Shown are cytosolic calcium concentration ( $[Ca^{2+}]_{cyt}$ ) dynamics in the ROI in response to 1  $\mu$ M flg22  
1013 over time. Normalized R-GECO1 fluorescence intensities ( $\Delta F/F$ ) were measured from a region of  
1014 interest (ROI) containing the meristematic and elongation zone of the root.

1015

1016

1017

1018

1019

1020

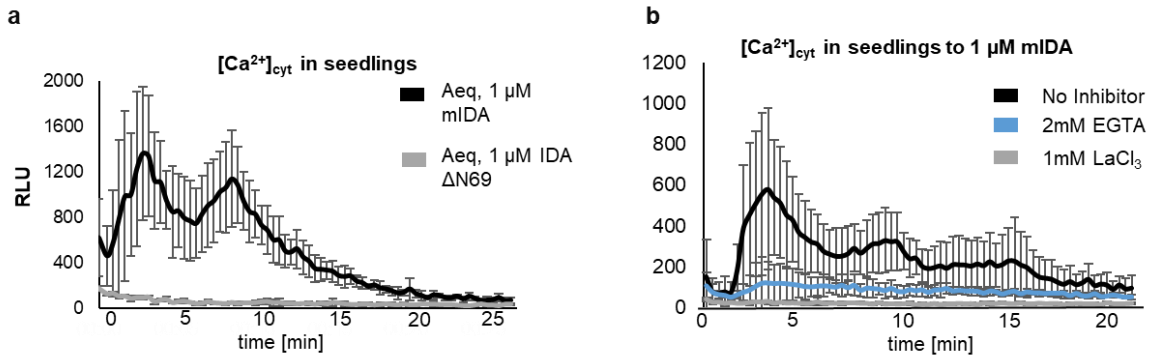

1021

1022 **Sup Fig. 4 : The IDA triggered increase in [Ca<sup>2+</sup>]<sub>cyt</sub> is abolished in the presence of Ca<sup>2+</sup> inhibitors**

1023 **a**, Increase in [Ca<sup>2+</sup>]<sub>cyt</sub> in 7 days old seedlings expressing the cytosolic localized *Aequorin*-based  
1024 luminescence Ca<sup>2+</sup> sensor (*Aeq*) measured in relative light units (RLU) treated with 1 μM mIDA (black).  
1025 No response is observed in *Aeq* seedlings treated with 1 μM IDAΔN69 (gray) or in *hae hsl2 Aeq*  
1026 seedlings treated with 1 μM mIDA (blue). **b**, Increase in [Ca<sup>2+</sup>]<sub>cyt</sub> in 7 days old seedlings expressing the  
1027 cytosolic localized *Aequorin*-based luminescence Ca<sup>2+</sup> sensor (*Aeq*) measured in relative light units  
1028 (RLU) treated with 1 μM mIDA . No response is observed in *Aeq* seedlings treated with 1 mM EGTA  
1029 (blue) or 1mM LaCl<sub>3</sub> (grey). Curves represent average of 3 independent experiments with 4-6  
1030 replicates in each experiment.

1031

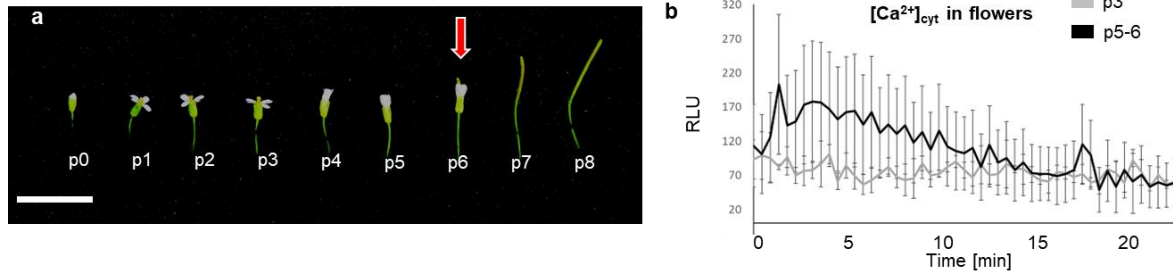

1032

1033 **Sup Fig. 5: mIDA induces a  $Ca^{2+}$  response in flowers**

1034 **a**, Arabidopsis flowers and siliques at different developmental stages. Flowers along the main  
1035 inflorescence are counted from the first flower with visible white petals at the top of the inflorescence  
1036 and is defined as p 1. Subsequently older flowers along the inflorescence (p0-p8). Cell wall remodeling  
1037 in AZ cells, accompanied with a reduction in petal breakstrength (the force required to remove a petal  
1038 from the receptacle) is initiated at p6 (red arrow). By p7 AZ cells have undergone cell separation and  
1039 the floral organs have abscised. P=position **b**, Increase in  $[Ca^{2+}]_{cyt}$  in flowers expressing the cytosolic  
1040 localized *Aequorin*-based luminescence  $Ca^{2+}$  sensor (*Aeq*) measured in relative light units (RLU) treated  
1041 with 1  $\mu$ M mIDA. A  $[Ca^{2+}]_{cyt}$  increase is observed in flowers where there is an initial weakening of the  
1042 cell walls (p5-6) (black). No increase in luminescence was observed in *Aeq* expressing flowers of an  
1043 earlier developmental stage (p3) (gray). Curves show representative measurements. Three  
1044 independent experiments were performed with 4-6 replicates in each experiment.

1045

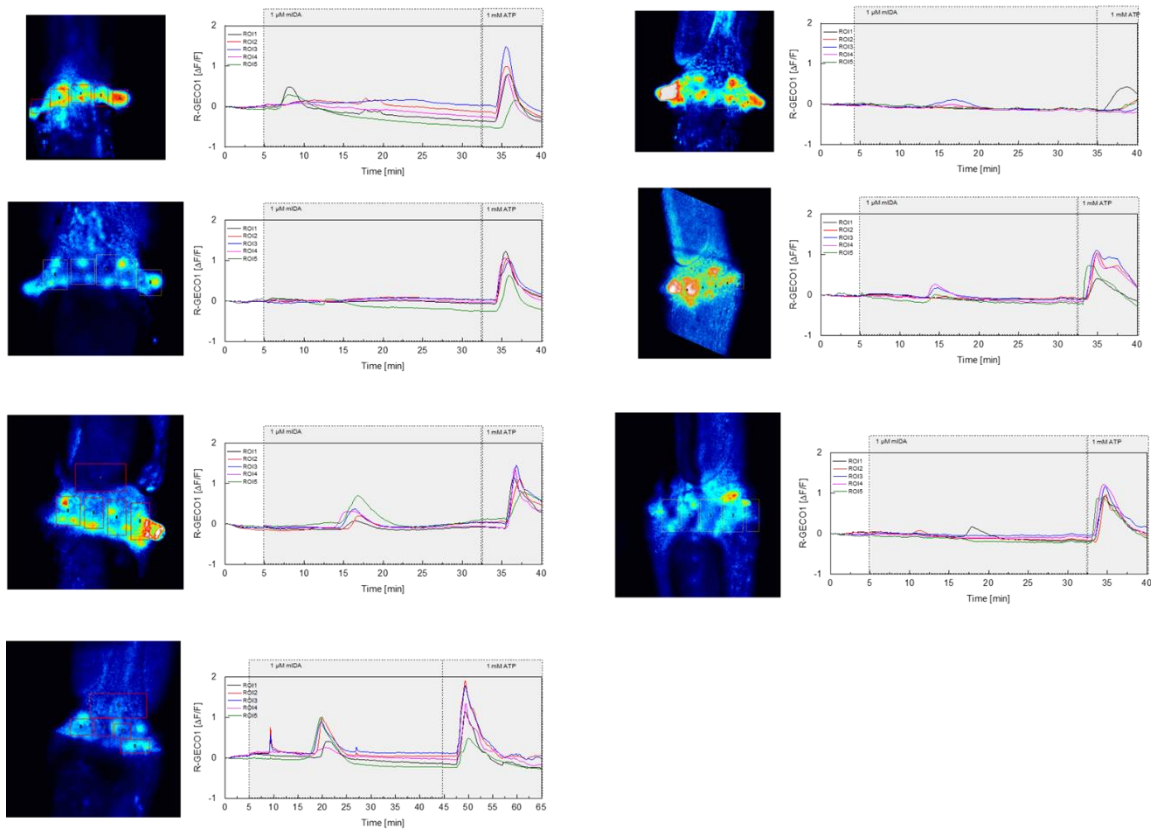

1046

1047 **Sup Fig. 6: mIDA-induced  $[Ca^{2+}]_{cyt}$  release in Arabidopsis abscission zones.** Normalized R-GECO1  
1048 fluorescence intensities ( $\Delta F/F$ ) were measured from regions of interest (ROIs) in floral abscission zone  
1049 (AZ)s. Shown are cytosolic calcium concentration ( $[Ca^{2+}]_{cyt}$ ) dynamics in the ROI1-5 in response to 1  $\mu M$   
1050 mIDA over time.

1051

1052

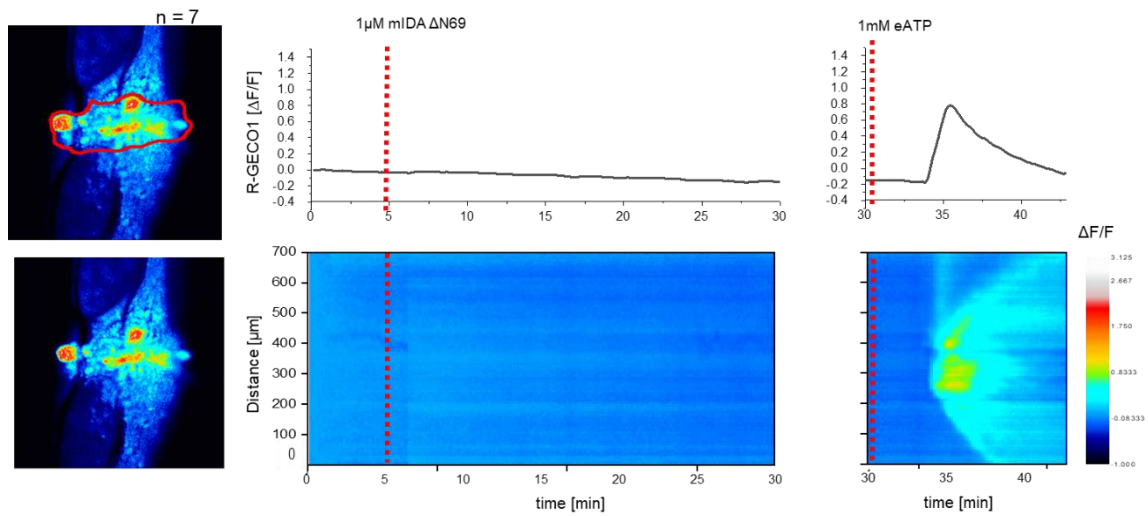

1053

1054 **Sup Fig. 7 : mIDAΔN69 does not induce a  $[\text{Ca}^{2+}]_{\text{cyt}}$  release in Arabidopsis abscission zones (AZ)**

1055 Normalized R-GECO1 fluorescence intensities ( $\Delta F/F$ ) were measured from regions of interest (ROI)  
1056 (outlined in red) in the floral AZs. Shown are cytosolic calcium concentration ( $[\text{Ca}^{2+}]_{\text{cyt}}$ ) dynamics in the  
1057 ROI in response to application of  $1\mu\text{M}$  mIDAΔN69 or eATP over time. Red lines at 5 minutes (min)  
1058 indicates application of mIDAΔN69 peptide or application of eATP at 30 min (see also Movie 4).  
1059 Representative response from 10 flowers. The increase in  $[\text{Ca}^{2+}]_{\text{cyt}}$  response to eATP propagates  
1060 through the AZ as a single wave seen as normalized R-GECO1 fluorescence intensities ( $\Delta F/F$ ) shown as  
1061 a heat map.

1062

1063

1064

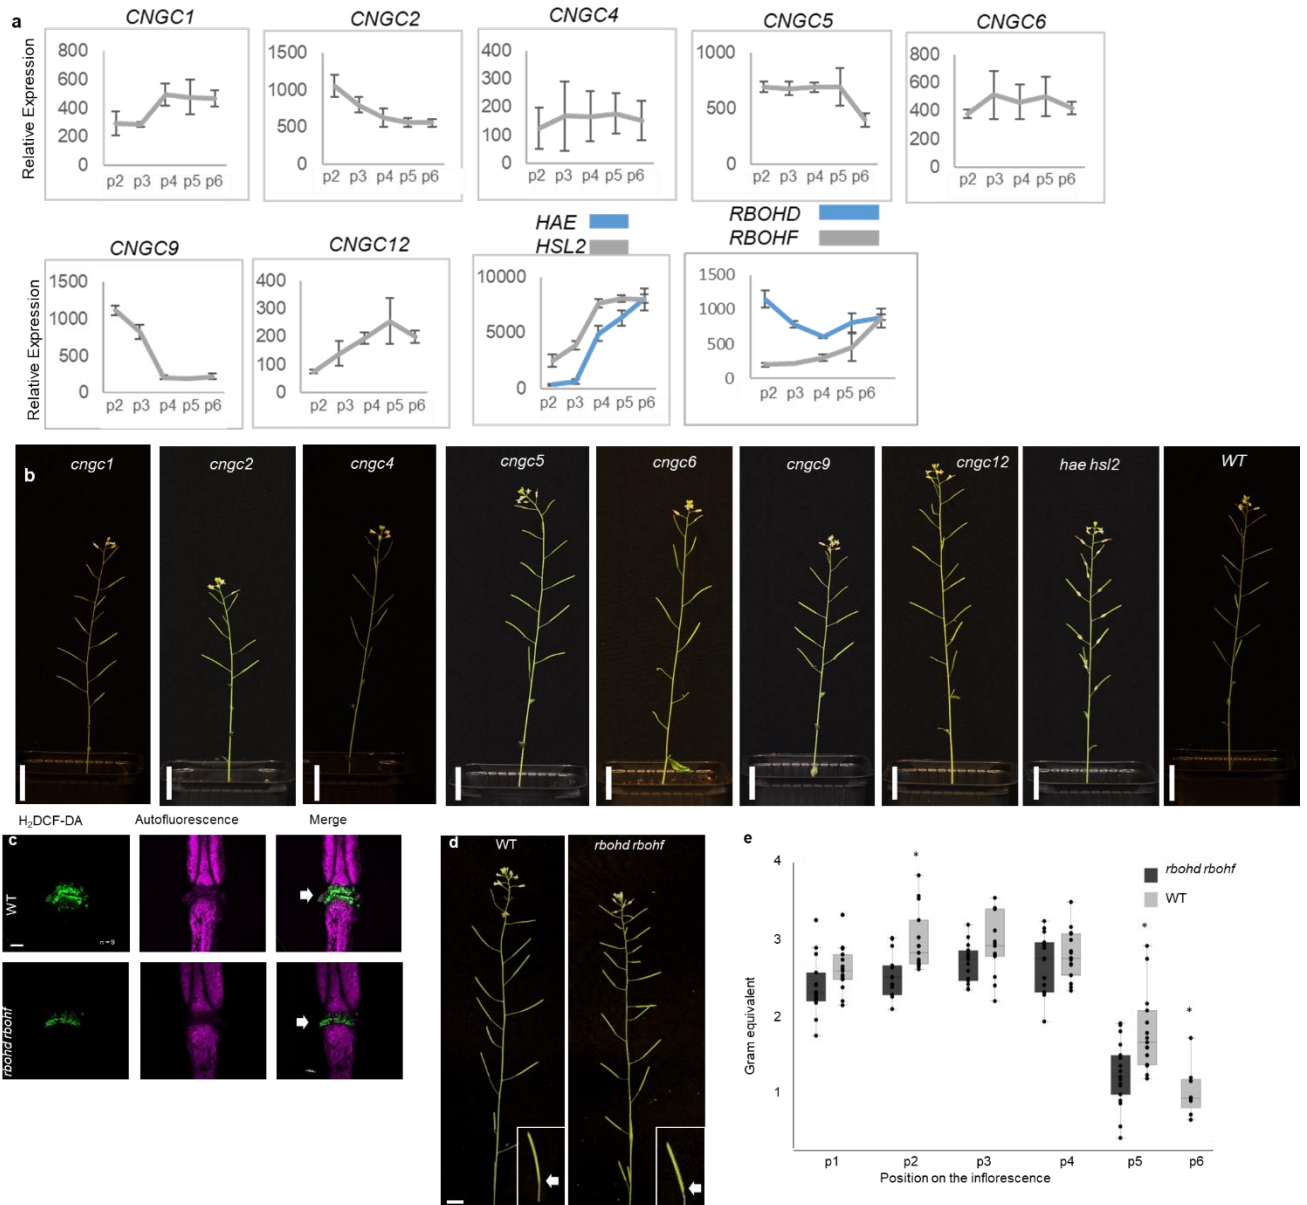

1065

1066 **Sup Fig. 8: Investigation of CNGCs and RBOHs in the abscission process**

1067 **a**, Relative expression of *CNGC1*, *CNGC2*, *CNGC4*, *CNGC5*, *CNGC6*, *CNGC9*, *CNGC12*, *RBOHD* and *RBOHF*  
 1068 in the floral organs during the onset of abscission (Cai and Lashbrook 2008). X-axis represents the  
 1069 developmental stages of abscission where position 12 represent flowers where the stamen and petals  
 1070 are of the same length, position 13 represent flowers at anthesis, position 15 represent flowers with  
 1071 stigma extended above the anthers. Floral organ abscission occurs at position 15. Relative expression  
 1072 of *HAE* and *HSL2* added for comparison. Nomenclature for the abscission process and relative  
 1073 expression values taken from (Cai and Lashbrook 2008). **b**, No floral organ abscission phenotype is  
 1074 observed in the single *cngc* mutant plants compared to the *hae hsl2* mutant which retains the floral  
 1075 organ indefinitely. Scale bar = 2cm, 5 weeks old plants. **c**, ROS production in the AZ (white arrow head)  
 1076 detected by using the fluorescent dye H<sub>2</sub>DCF-DA in WT and *rbohd rbohF* flowers at position 6 (See



1077 Supplementary Fig. 5a for positions). Scale bar = 100  $\mu$ m, maximum intensity projections of z-stacks.  
1078 Representative pictures from 9 flowers. **d**, Representative pictures of WT and *rboh*d *rboh*f  
1079 inflorescences, scale bar for inflorescences = 1 cm. **e**, Petal break strength (pBS) measurements of WT  
1080 and the *rboh*d *rboh*f mutant at position 1-6 along the inflorescence. Force required to remove petals  
1081 from the receptacle represented in gram equivalent. \* = significantly different from WT at the given  
1082 position ( $p < 0.05$ , student t-test, two tailed).

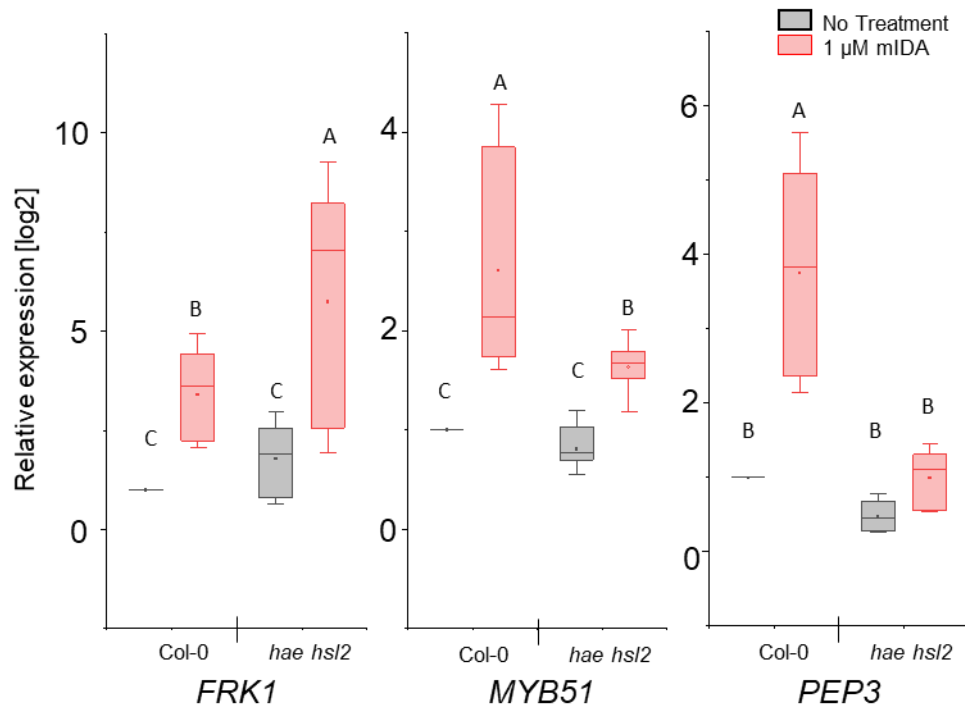

1083

1084 Sup Fig. 9: mIDA induced enhanced transcription of defense-associated marker genes is only partially  
1085 dependent on the HAE and HSL2 receptors

1086 RT-qPCR data showing transcription of *FRK1*, *MYB51*, and *PEP3* in Col-0 WT and *hae hsl2* seedlings  
1087 exposed to 1 μM mIDA for 1 h compared to untreated seedlings (No treatment). *ACTIN* was used to  
1088 normalize mRNA levels. Figure represent 3 biological replicates with 4 technical replicates. Statistical  
1089 analyses was performed comparing samples within same gene, using two-way ANOVA and post-hoc  
1090 Tukey's test ( $p < 0.05$ ).

1091

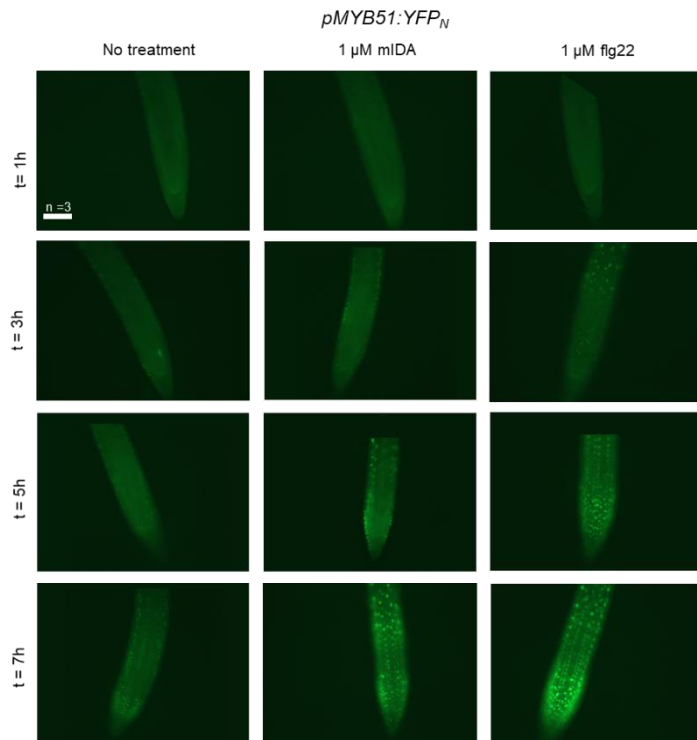

1092

1093

1094 **Sup Fig. 10: mIDA and flg22 induced expression of *pMYB51:YFP***

1095 Representative microscopic pictures of 7-days-old *pMYB51:YFP<sub>N</sub>* roots from seedlings transferred to  
1096 liquid medium with 1  $\mu$ M flg22 or 1  $\mu$ M mIDA for 1, 3, 5 and 7 h using a fluorescent microscope.

1097 Control seedlings were transferred to medium with no peptide and imaged in the same time frame.

1098 Fluorescent nuclei could be observed in a similar temporal pattern in roots subjected to mIDA and

1099 flg22. Scale bar = 100  $\mu$ m, single plane images using a Zeiss Axioplan2 microscope with an AxioCam

1100 HRc, 20x air objective and a YFP filter (Excitation: 500/20, Beamsplitter: FT515, Emission: 535/50), no

1101 imaging processing was performed, t = time in h. n = 3, experiment repeated 3 times.

1102

1103

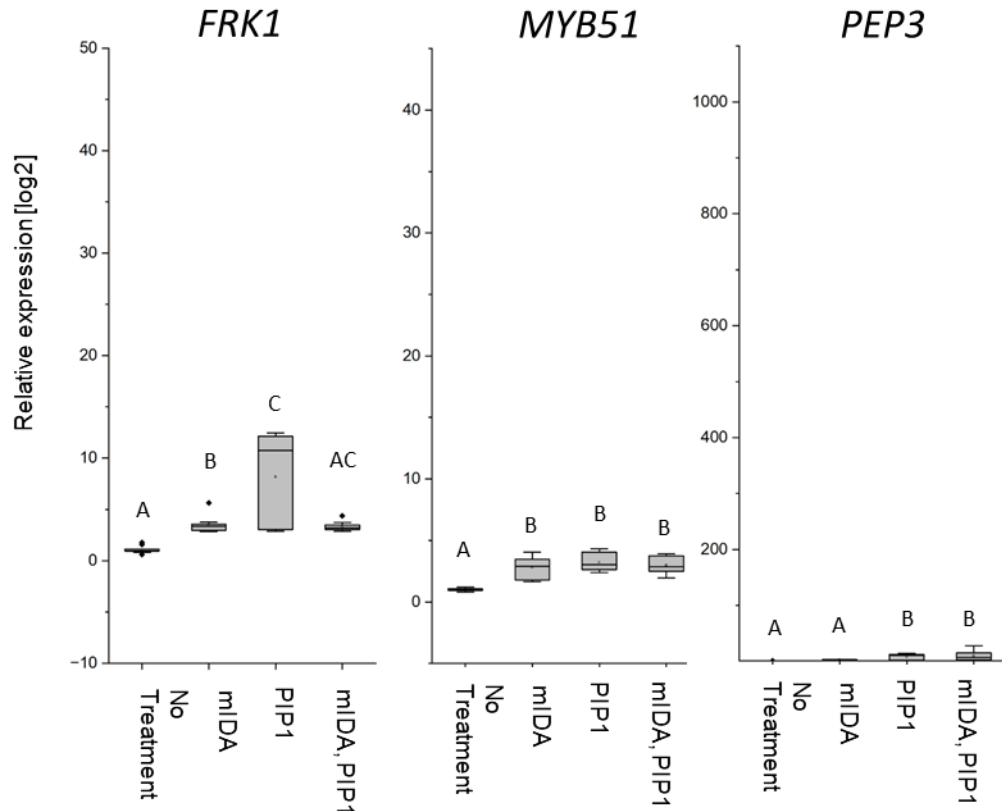

1104

1105

1106 **Sup Fig. 11 : mIDA and PIP1 co-treatment do not enhances transcription of defense-associated**  
1107 **marker genes**

1108 RT-qPCR data showing transcription of *FRK1*, *MYB51*, and *PEP3* in Col-0 WT seedlings exposed to 1  $\mu$ M  
1109 mIDA, 1  $\mu$ M PIP1 or a combination of 1  $\mu$ M mIDA and 1  $\mu$ M PIP1 for 1 h compared to untreated  
1110 seedlings (No treatment control). *ACTIN* was used to normalize mRNA levels. Figure showing extended  
1111 results from experiment shown in Fig 6. For comparison, No treatment and mIDA treated samples  
1112 were included in the figure (same results presented in Fig 6). Scale on y axis was kept as in Fig 6.  
1113 Figure represents 2-3 biological replicates with 4 technical replicates. Statistical analyses comparing  
1114 the samples was performed using one-way ANOVA and post-hoc Tukey's test ( $p < 0.05$ ).

1115

1116

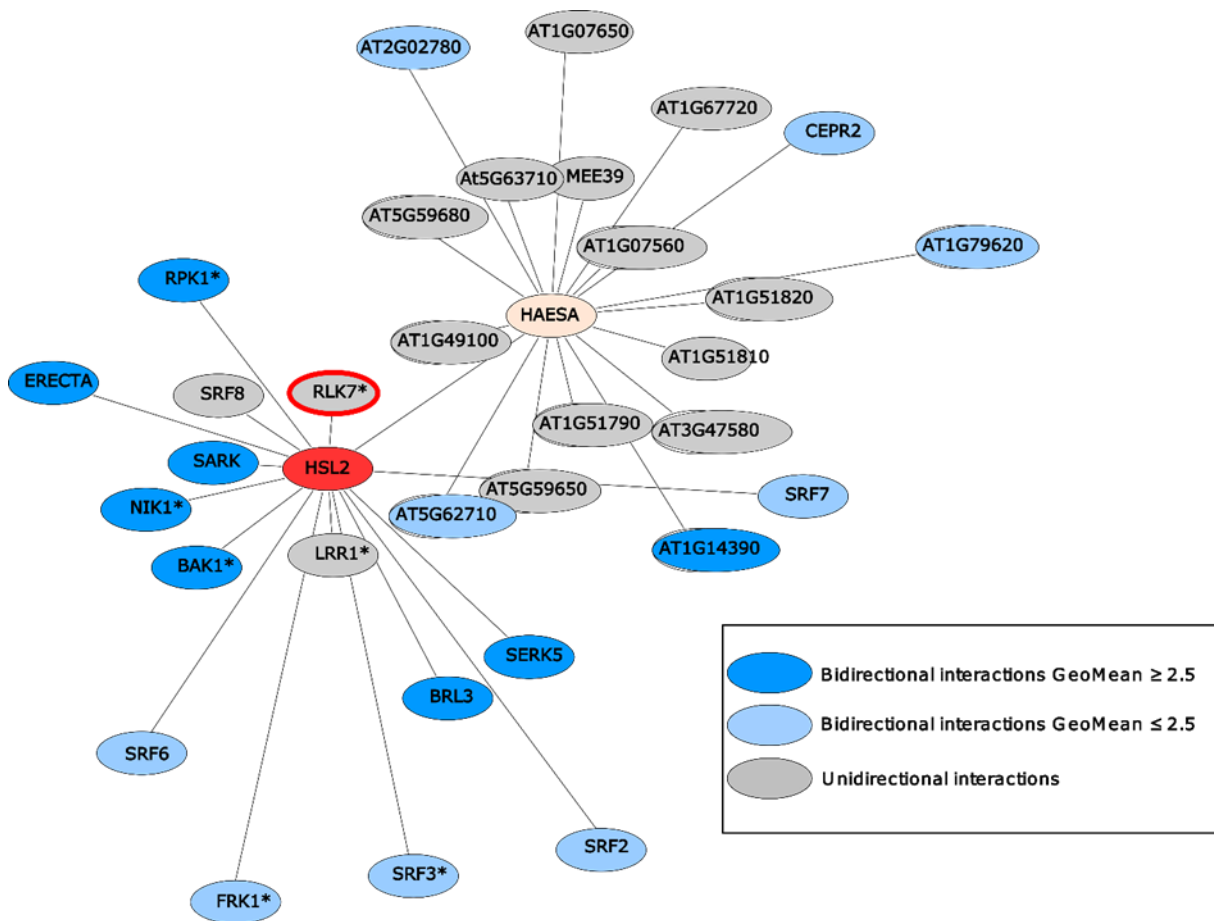

1117

1118 Sup Fig. 12: HAE (yellow) and HSL2 (red) display very distinct repertoire of immune and growth-related  
1119 interacting LRR-RKs.

1120 HEA and HSL2 specific interacting partners determined using a sensitized high-throughput  
1121 extracellular domain interaction assay (Smakowska-Luzan et al.,2018). HSL2 and HAE show distinct  
1122 interacting LRR-RKs where only HSL2 was found to interact with RLK7 (red halo). \* indicates receptors  
1123 known to play a function in biotic and/or abiotic responses in planta based on previous published  
1124 work, dark blue nodes refer to bidirectional interactions with GeoMean  $\geq 2.5$ , light blue nodes- refer to  
1125 bidirectional interactions with GeoMean  $\leq 2.5$ , and grey nodes refer to unidirectional interactions.

1126

1127

1128

1129
